## Poly lactide Degradation Activates Immune Cells by Metabolic Reprogramming

Chima V. Maduka<sup>1,2,3</sup>, Mohammed Alhaj<sup>4</sup>, Evran Ural<sup>2,3</sup>, Michael O. Habeeb<sup>2,3</sup>, Maxwell M. Kuhnert<sup>2,3</sup>, Kylie Smith<sup>2,3</sup>, Ashley V. Makela<sup>2,3</sup>, Hunter Pope<sup>2,3</sup>, Shoue Chen<sup>5</sup>, Jeremy M. Hix<sup>3</sup>, Christiane L. Mallett<sup>3</sup>, Seock-Jin Chung<sup>2,3</sup>, Maxwell Hakun<sup>2,3</sup>, Anthony Tundo<sup>2,3</sup>, Kurt R. Zinn<sup>2,3</sup>, Kurt D. Hankenson<sup>6</sup>, Stuart B. Goodman<sup>7,8</sup>, Ramani Narayan<sup>4</sup>, Christopher H. Contag<sup>2,3,9\*</sup>

<sup>1</sup> Comparative Medicine & Integrative Biology, Michigan State University, East Lansing, MI 48824, USA

<sup>2</sup> Department of Biomedical Engineering, Michigan State University, East Lansing, MI 48824, USA

<sup>3</sup> Institute for Quantitative Health Science & Engineering, Michigan State University, East Lansing, MI 48824, USA

<sup>4</sup> Department of Chemical Engineering & Materials Science, Michigan State University, East Lansing, MI 48824, USA

<sup>5</sup>School of Packaging, Michigan State University, East Lansing, MI, 48824 USA

<sup>6</sup> Department of Orthopedic Surgery, University of Michigan Medical School, Ann Arbor, MI 48109, USA.

<sup>7</sup> Department of Orthopedic Surgery, Stanford University, CA 94063, USA.

<sup>8</sup> Department of Bioengineering, Stanford University, CA 94305, USA.

<sup>9</sup> Department of Microbiology & Molecular Genetics, Michigan State University, East Lansing, MI 48864, USA.

\*Corresponding author: Christopher H. Contag, [contagch@msu.edu](mailto:contagch@msu.edu)

### ABSTRACT

Poly lactide (PLA) is the most widely utilized biopolymer in medicine. However, chronic inflammation and excessive fibrosis resulting from its degradation remain significant obstacles to extended clinical use. Immune cell activation has been correlated to the acidity of breakdown products, yet methods to neutralize the pH have not significantly reduced adverse responses. Using a bioenergetic model, we observed delayed cellular changes that were not apparent in the short-term. Amorphous and semi-crystalline PLA degradation products, including monomeric L-lactic acid, mechanistically remodel metabolism in cells leading to a reactive immune microenvironment characterized by elevated proinflammatory cytokines. Selective inhibition of metabolic reprogramming and altered bioenergetics both reduce these undesirable high cytokine levels and stimulate anti-inflammatory signals. Our results present a new biocompatibility paradigm by identifying metabolism as a target for immunomodulation to increase tolerance to biomaterials, ensuring safe clinical application of PLA-based implants for soft- and hard-tissue regeneration, and advancing nanomedicine and drug delivery.

**Keywords:** Poly lactide, Metabolic Reprogramming, Immune Cells, Tissue Regeneration, Biocompatibility

Poly lactide (PLA) is the most widely utilized biopolymer<sup>1</sup>, with applications in nanotechnology, drug delivery and adult reconstructive surgery for tissue regeneration. However, after surgical implantation, PLA elicits adverse immune responses in up to 44% of human patients, often requiring further interventions<sup>2,3</sup>. In animals, a 66% incidence of excessive fibrosis with capsules from long-term inflammation which significantly limit implant-tissue integration has been reported<sup>4</sup>. PLA degrades by hydrolysis into D- or L-lactic acid, with semi-crystalline PLA degrading slower and tending to contain less D-content than amorphous PLA<sup>1,5</sup>. Adverse responses to PLA are exacerbated by mechanical loading and increasing implant size<sup>6</sup>, and occur after prolonged exposure to large amounts of PLA degradation products<sup>2,7-9</sup>. It is speculated that adverse responses are mediated by PLA degradation reducing pH in surrounding tissue<sup>10</sup>, the historical basis of which involved *Photobacterium phosphoreum*<sup>11</sup>. This bacterium expresses a luciferase whose reduced metabolic activity, measured by bioluminescence, can infer toxicity. In this study, breakdown products (extract) of PLA were obtained either in sterile water or Tris buffer; addition of acidic extract correlated with reduced luminescence. However, the study was not performed on mammalian cells, did not reflect the buffered in-vivo microenvironment or simulate prolonged exposure times to accumulated

54 PLA degradation products. Establishing that a decrease in pH correlates with PLA degradation has  
55 informed the current strategy in regenerative medicine to neutralize acidic PLA degradation products both  
56 in-vitro and in-vivo using polyphosphazene<sup>12</sup>, calcium carbonate, sodium bicarbonate and calcium  
57 hydroxyapatite salts<sup>10</sup>, bioglass<sup>13</sup> and composites containing alloys or hydroxides of magnesium<sup>14,15</sup> despite  
58 reports of failures<sup>16</sup>. The lack of a clearly described mechanism of immune cell activation by PLA  
59 degradation remains a major obstacle in the safe application of large-PLA based implants in load-bearing  
60 applications as reflected by their paucity in FDA approvals<sup>17</sup>, and in soft tissue surgery where neutralizing  
61 ceramics cannot be applied<sup>18</sup>.

62 Metabolic reprogramming refers to significant changes in oxidative phosphorylation and glycolytic  
63 flux patterns and is a driver of fibrosis and bacterial lipopolysaccharide (LPS)-induced inflammation<sup>19,20</sup>.  
64 Here we set out to establish a molecular mechanism that directly links metabolic reprogramming to  
65 inflammation and fibrosis, consequent to cellular interactions with PLA degradation products. Foremost, we  
66 develop and validate a bioenergetic model of prolonged immune cell interaction with accumulated PLA  
67 degradation products. Only after prolonged exposure to amorphous or semi-crystalline PLA degradation  
68 products did macrophages and fibroblasts mechanistically undergo metabolic reprogramming and marked  
69 bioenergetic changes, with higher PLA crystallinity delaying onset. Using our model, we observed that PLA  
70 breakdown products markedly increase proinflammatory cytokine expression in primary macrophages  
71 through lactate signaling. Targeting different glycolytic steps using small molecule inhibitors modulated  
72 proinflammatory and stimulated anti-inflammatory cytokine expression by inhibiting metabolic  
73 reprogramming and altered bioenergetics in a dose-dependent manner. This process is highly specific and  
74 not cytotoxic to surrounding unaffected immune cells. Further, we demonstrate that use of the small  
75 molecule inhibitors imbedded in PLA implants substantiated our hypothesis of controlling the inflammatory  
76 response in-vivo. Our findings establish a new biocompatibility paradigm by identifying altered metabolism  
77 as a target for immunomodulation of PLA-based implants, fundamentally differing from previous strategies  
78 aimed at neutralizing PLA. Therefore, major advances in the use of PLA for human and veterinary  
79 applications are anticipated.

80

### 81 **Bioenergetic model for evaluating cellular responses to PLA degradation.**

82 To simulate in-vivo buffer conditions, breakdown products of PLA, generally referred to as  
83 extracts<sup>21</sup>, were generated in serum-containing DMEM medium and used after 12 days (d) of incubation in  
84 a shaker at 37 °C (Fig. 1a). This in-vitro degradation method was designed to mimic PLA degradation in-  
85 vivo, with agitation to accelerate PLA degradation relative to static methods<sup>22</sup>. Due to the buffering inherent  
86 in the serum-containing DMEM medium, there were no changes in pH over the 12 d extraction period for  
87 serum-containing control medium (pH = 8.0), amorphous PLA (pH = 8.2) and crystalline PLA (pH = 8.2)  
88 extracts used on cells. On the other hand, extraction in water for the same duration resulted in pH  
89 differences between control (pH = 8.2), amorphous PLA (pH = 7.5) and crystalline PLA (pH = 7.6) extracts.

90 Together, studies in rodents, dogs and humans indicate that adverse immune responses occur  
91 after accumulation of PLA degradation products over several weeks or months<sup>8,23-25</sup>. To account for these  
92 extended exposure times in our model, we cultured immune cells in PLA extract for 12 d, and this required  
93 initiating our cultures with small numbers of cells per well in both control and treatment groups to prevent  
94 overgrowth of the cultures. Mouse embryonic fibroblasts (NIH 3T3 cells) were stably transfected with a  
95 Sleeping Beauty transposon plasmid (pLuBIG) having a bidirectional promoter driving a modified firefly  
96 luciferase gene (fLuc) and a fusion gene encoding a Blasticidin-resistance marker (BsdR) linked to eGFP  
97 (BGL)<sup>26</sup>. Seeding the same cell numbers across control and treatment groups resulted in constant levels of  
98 luciferase and we exposed cells to equal levels of D-luciferin and oxygen in all assays. In this manner, ATP  
99 was rate-limiting and changes in ATP were measured by bioluminescence using in-vivo imaging system  
100 (IVIS; Fig. 1b). Use of bioluminescence as an indicator of ATP levels was inexpensive, rapid (on the order  
101 of seconds) and allowed for high throughput temporal bioenergetic analysis in live cells. Additionally, in our  
102 model, each well of a 96-well plate had a total of 200  $\mu$ l of medium, of which 100  $\mu$ l was freshly prepared.  
103 The additional 100  $\mu$ l for control wells was medium that had been in the shaker at 37 °C for 12 d to account  
104 for potential nutrient degradation that could confound results. Similarly, the additional 100  $\mu$ l for treatment  
105 wells was medium in which PLA had been degraded under the same conditions.

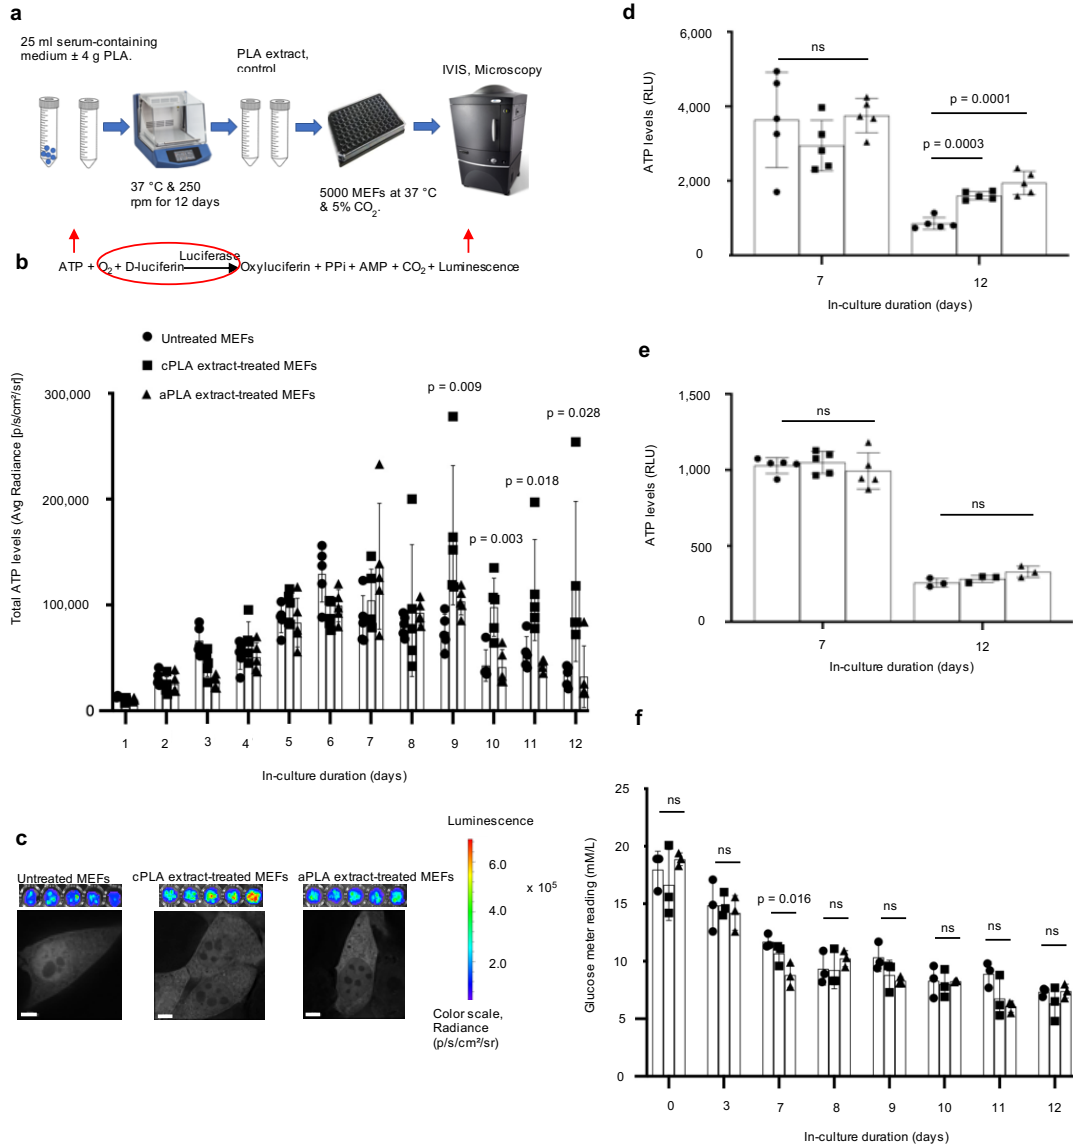

**Figure 1 | Bioenergetic (ATP) levels are elevated in mouse embryonic fibroblasts (MEFs) only after prolonged exposure to polylactide (PLA) degradation products (extract).** **a**, Workflow showing our in-vitro bioenergetic model. **b**, Keeping luciferase, oxygen and D-luciferin levels constant (red circle) allows for changes in ATP (red arrow) to be measured by luminescence (red arrow). Using in-vivo imaging system (IVIS) and in comparison to controls, ATP levels in live cells are increased in blasticidin-eGFP-luciferase (BGL)-transfected MEFs after prolonged exposure to crystalline PLA (cPLA) degradation products. **c**, Representative microscopic (scale bars, 5 μm) and IVIS images show differential nucleoli number and luminescence, respectively. **d**, Measuring ATP in cell lysates of wild-type MEFs revealed that prolonged exposure to both amorphous PLA (aPLA) and cPLA results in elevated ATP levels. **e**, Addition of PLA does not affect the biochemical reaction by which ATP is measured. **f**, Between groups on the same day, glucose levels are similar in our in-vitro bioenergetic model. Not significant (ns), mean (SD), n = 5 (Fig. 1b, 1d and day 7 for 1e) or n = 3 (Fig. 1f and day 12 for 1e), one-way ANOVA followed by Tukey's post-hoc test; 100 μl of control or PLA extract was used.

106  
107  
108  
109  
110  
111  
112  
113  
114  
115

Dose-bioenergetic response of amorphous and crystalline PLA extracts revealed altered ATP levels for all tested doses (Supplementary Fig. 1a). Therefore, we selected 100 or 150 μl of extract, as indicated in figure legends, to mimic accumulation of voluminous PLA breakdown products<sup>2,7</sup>.

Highly crystalline and amorphous PLA samples were selected for their high molecular weights and represent a range of physicochemical properties (crystallinity, stereochemistry, degradation period) which constitute important considerations in selecting PLA for hard and soft tissue engineering<sup>8,10,25</sup>. Before using these PLA materials, we authenticated their physicochemical and thermal properties (Supplementary Table 1). Lastly, we used the non-transformed, immortalized NIH 3T3 fibroblast cell line that typifies primary

116 fibroblasts, as well as primary bone-marrow derived macrophages, both of which are key cellular mediators  
 117 of prolonged inflammation and excessive fibrosis that occur in response to PLA degradation<sup>12,23</sup>.  
 118

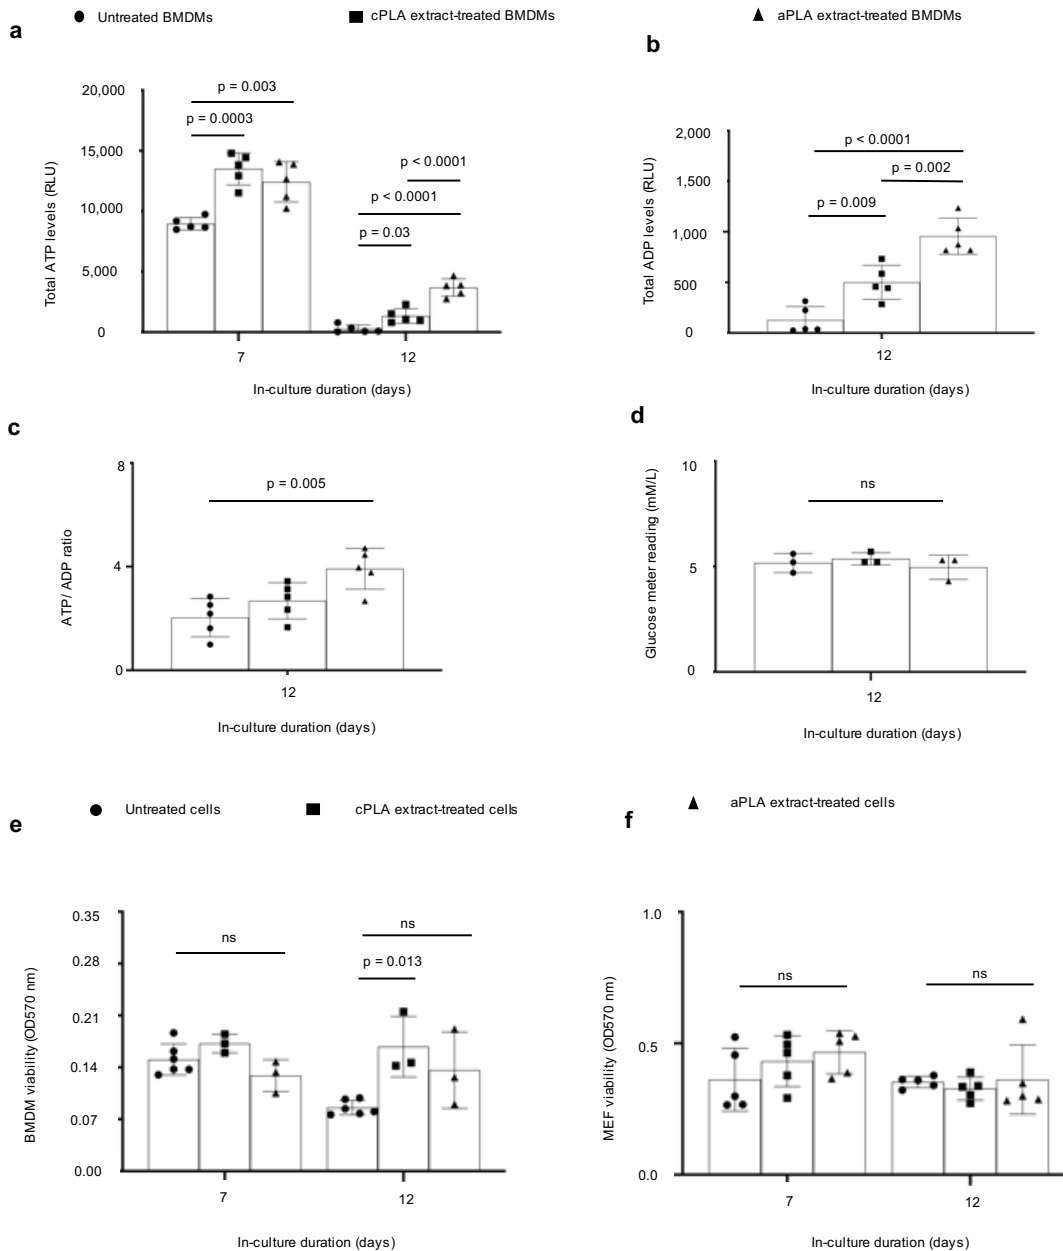

**Figure 2 | Bioenergetics is increased in primary bone marrow-derived macrophages (BMDMs) after prolonged exposure to polylactide (PLA) degradation products (extract).** a, ATP levels b, ADP levels c, and ATP/ADP ratios are increased in BMDMs after prolonged exposure to amorphous PLA (aPLA) or crystalline PLA (cPLA) degradation products (extracts) in comparison to controls. d, Glucose levels between groups on day 12 are similar. e-f, Cell number between groups are similar for BMDMs (e) and MEFs (f). Not significant (ns), mean (SD), n = 5 (Fig. 2a, b, c, f), n = 3 (Fig. 2d), n = 3-6 (Fig. 2e), one-way ANOVA followed by Tukey's post-hoc test; 100  $\mu$ l of control or PLA extract was used.

119  
 120 **Bioenergetics is altered in immune cells after exposure to PLA degradation products**  
 121 Unlike in the short-term (days 0-5), prolonged (days 6-12) exposure of fibroblasts to either  
 122 amorphous or crystalline PLA increased ATP levels in live cells (Fig. 1b-c). Upon high resolution z-stack  
 123 imaging, there were apparent changes in nucleoli number (Fig. 1c) after prolonged exposure to either  
 124 amorphous or crystalline PLA extract, which could represent a stress response<sup>27</sup>. To exclude the possibility  
 125 that changing luciferase expression (by transcription or translation) was responsible for observed

126 bioenergetic changes, we lysed wild-type cells after exposure to PLA extract and added controlled amounts  
127 of luciferase and D-luciferin in the standard ATP assay. Moreover, measuring ATP levels in live cells by  
128 IVIS is constrained by parameters inherent to live cells. Lysed cells allow for the measurement of ATP from  
129 all organellar compartments, and is not constrained by D-luciferin uptake, revealing more information than  
130 measurements in live cells. By day 12, there was a 1.9- and 2.3-fold increase in ATP levels among cells  
131 exposed to crystalline and amorphous PLA extract, respectively (Fig. 1d). To exclude the possibility that  
132 PLA extracts affect the biochemical reaction (Fig. 1b) underlying bioenergetic measurements, fibroblasts  
133 were cultured for different time points. Thereafter, lysed fibroblasts were exposed to D-luciferin, luciferase  
134 and control or PLA extract at the same time. No difference in ATP levels was observed, confirming that  
135 treatment with PLA extract did not affect this biochemical reaction (Fig. 1e).

136 Declining ATP levels from day 0 to day 12 is likely due to changing glucose levels<sup>28</sup>. To determine  
137 whether glucose levels changed between groups on the same day because of the extended exposure times  
138 in our model, glucose meter readings were optimized in mammalian cell culture medium (Supplementary  
139 Fig. 1b). Glucose levels were similar between groups on each day (Fig. 1f). On day 7, when untreated  
140 groups had higher glucose levels (Fig. 1f), corresponding bioenergetic measurement revealed that PLA  
141 extract-treated fibroblasts had higher ATP levels (Supplementary Fig. 1c), excluding changing glucose  
142 levels as a confounding factor in our bioenergetic model. Because NIH 3T3 cells are normal immortalized  
143 fibroblasts, changing cell number from proliferation could account for bioenergetic changes. To exclude  
144 this, we optimized the crystal violet assay for cell number measurement<sup>29</sup> in fibroblasts (Supplementary Fig.  
145 2a). Next, we isolated mouse primary bone marrow-derived macrophages (BMDMs) which, unlike NIH 3T3  
146 cells, do not proliferate<sup>30</sup>.

147 Both ATP<sup>31</sup> and ADP<sup>32</sup> metabolism and ratios are crucial in inflammatory conditions. In BMDMs  
148 and consistent with our observations in fibroblasts, we observed marked increases in ATP and ADP levels  
149 (Fig. 2a, b) or ATP/ADP ratios (Fig. 2c) which were not due to changing glucose levels (Fig. 2d). After  
150 optimizing the crystal violet assay for macrophages (Supplementary Fig. 2b), overall, cell numbers could  
151 not account for observed bioenergetic changes (Fig. 2e). Furthermore, fibroblast numbers were similar for  
152 cultures that were untreated or exposed to PLA extracts (Fig. 2f), excluding changing cell number as a  
153 confounder in our model.

### 154 **Exposure of macrophages to PLA breakdown products selectively results in metabolic** 155 **reprogramming**

156 To determine the metabolic pathways responsible for the bioenergetic changes we had observed,  
157 Seahorse assays were used to measure oxygen consumption rate (OCR), extracellular acidification rate  
158 (ECAR) and lactate-linked proton efflux rate (PER) in a customized medium (pH 7.4); this technique has  
159 not been previously used to examine PLA-induced adverse responses. PLA extract was removed and  
160 washed off the cells prior to running the Seahorse assay at a pH of 7.4. Seahorse assays measure ECAR  
161 as an index of glycolytic flux, OCR as an index of oxidative phosphorylation and PER as an index of  
162 monocarboxylate transporter function<sup>33</sup> in live cells; and are used to assess for metabolic reprogramming<sup>34-</sup>  
163 <sup>36</sup>. Primary BMDMs exposed to amorphous PLA extract were metabolically altered, showing a 2-fold  
164 increase in oxidative phosphorylation (OCR; Fig. 3a), 3.5-fold increase in glycolytic flux (ECAR; Fig. 3b)  
165 and 3.5-fold increase in monocarboxylate transporter activity (PER; Fig. 3c) in comparison to untreated  
166 BMDMs. Similar amounts (100  $\mu$ l) of crystalline PLA extract resulted in a 1.6-fold increase in OCR (Fig. 3d)  
167 but no change in ECAR (Fig. 3e) or PER (Fig. 3f). However, higher amounts (150  $\mu$ l) of crystalline PLA  
168 extract resulted in 3.2-, 3.8-, and 3.8-fold increases in OCR, ECAR and PER, respectively (Supplementary  
169 Fig. 3a-c) compared to controls, suggesting that greater volume of PLA extract is required for  
170 reprogramming using crystalline than amorphous PLA.

171 Next, we targeted different steps in the glycolytic pathway using three small molecule inhibitors: 3-  
172 (3-pyridinyl)-1-(4-pyridinyl)-2-propen-1-one (3PO), 2-deoxyglucose (2DG) and aminooxyacetic acid (a.a.).  
173 Whereas 3PO specifically inhibits 6-phosphofructo-2-kinase which is the rate limiting glycolytic enzyme<sup>37</sup>,  
174 2DG inhibits hexokinase, the first enzyme in glycolysis<sup>36</sup>, and aminooxyacetic acid prevents uptake of  
175 glycolytic substrates<sup>38</sup>. In a dose-dependent manner, 3PO, 2DG and a.a. inhibited metabolic  
176 reprogramming following exposure to amorphous PLA (Fig. 3a-c) or crystalline PLA extract (Fig. 3-f), but  
177 not in untreated BMDMs (Fig. 3g-i).

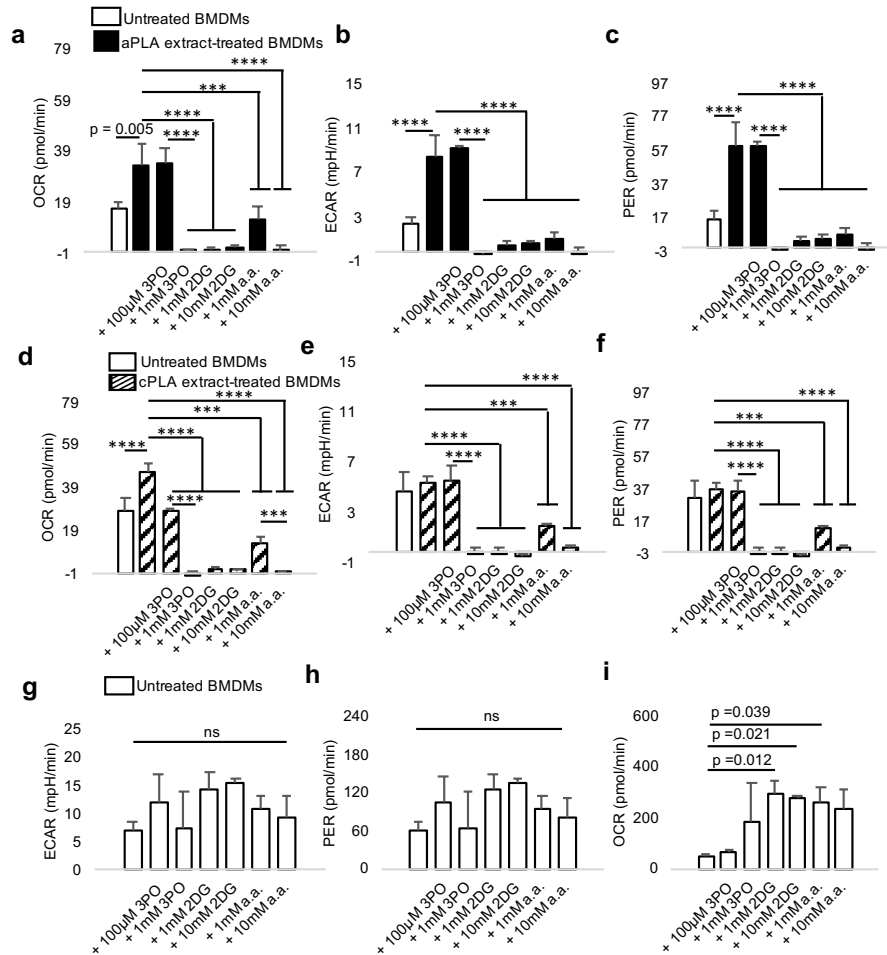

**Figure 3 | Functional metabolic indices are altered in primary bone marrow-derived macrophages (BMDMs) after prolonged exposure to poly(lactide) (PLA) degradation products (extract), and can be modulated by glycolytic inhibitors. a-c,** Following exposure to amorphous PLA (aPLA) extract, oxygen consumption rate (OCR) (a), extracellular acidification rate (ECAR) (b) and proton efflux rate (PER) (c) are increased relative to controls, and this abnormal increase can be dose-dependently controlled by various small molecule inhibitors. **d-f,** OCR (d) and not ECAR (e) and PER (f) are increased relative to controls in groups exposed to crystalline PLA (cPLA) extract, and functional metabolic indices can be controlled by pharmacologic inhibitors of glycolysis. **g-h,** ECAR (g) and PER (h) are not affected by glycolytic inhibitors in untreated BMDMs. **i,** Compensatory increase in OCR occurs in untreated BMDMs after treatment with some inhibitors. Not significant (ns), \*\*\* $p < 0.001$ , \*\*\*\* $p < 0.0001$ , mean (SD),  $n = 3$ , one-way ANOVA followed by Tukey's post-hoc test; 3-(3-pyridinyl)-1-(4-pyridinyl)-2-propen-1-one (3PO), 2-deoxyglucose (2DG) and aminoxyacetic acid (a.a.); 100  $\mu$ l of control or PLA extract was used for 7 days.

179 This demonstrates cellular uptake of 3PO, 2DG and a.a., yet with selective pharmacologic effects. Notably  
 180 and under the same experimental conditions, cell viability was not reduced in untreated BMDMs after  
 181 exposure to glycolytic inhibitors (Supplementary Fig. 2c), demonstrating the absence of cytotoxicity<sup>29</sup>.  
 182 However, when BMDMs were treated with amorphous or crystalline PLA extract, where metabolism was  
 183 abnormally remodeled, 3PO, 2DG and a.a. mildly, but selectively, reduced cell viability (Supplementary Fig.  
 184 2d). Therefore, pharmacologically targeting altered metabolism in primary BMDMs following exposure to  
 185 PLA extract is highly specific with limited toxicity to immune cells that have normal metabolic profiles.

### 186 187 **Fibroblasts are glycolytically reprogrammed after exposure to PLA breakdown products**

188 After prolonged exposure of fibroblasts to amorphous and crystalline PLA extracts, glycolytic flux  
 189 (ECAR; Fig. 4a-b) is increased by 1.6- and 1.7-fold, respectively. Furthermore, monocarboxylate transporter  
 190 function is increased in amorphous or crystalline PLA extract-treated fibroblasts by 1.6- and 1.5-fold,  
 191 respectively (Fig. 4c-d). However, oxidative phosphorylation remains similar between untreated fibroblasts  
 192 and cells exposed to amorphous or crystalline PLA extracts (OCR; Supplementary Fig. 4a-b). Remarkably,  
 193 increased bioenergetic (ATP) levels in amorphous or crystalline PLA extract-treated fibroblasts are inhibited  
 194 by 3PO, 2DG and a.a. in a temporal and dose-dependent manner (Fig. 4e; Supplementary Fig. 4c).

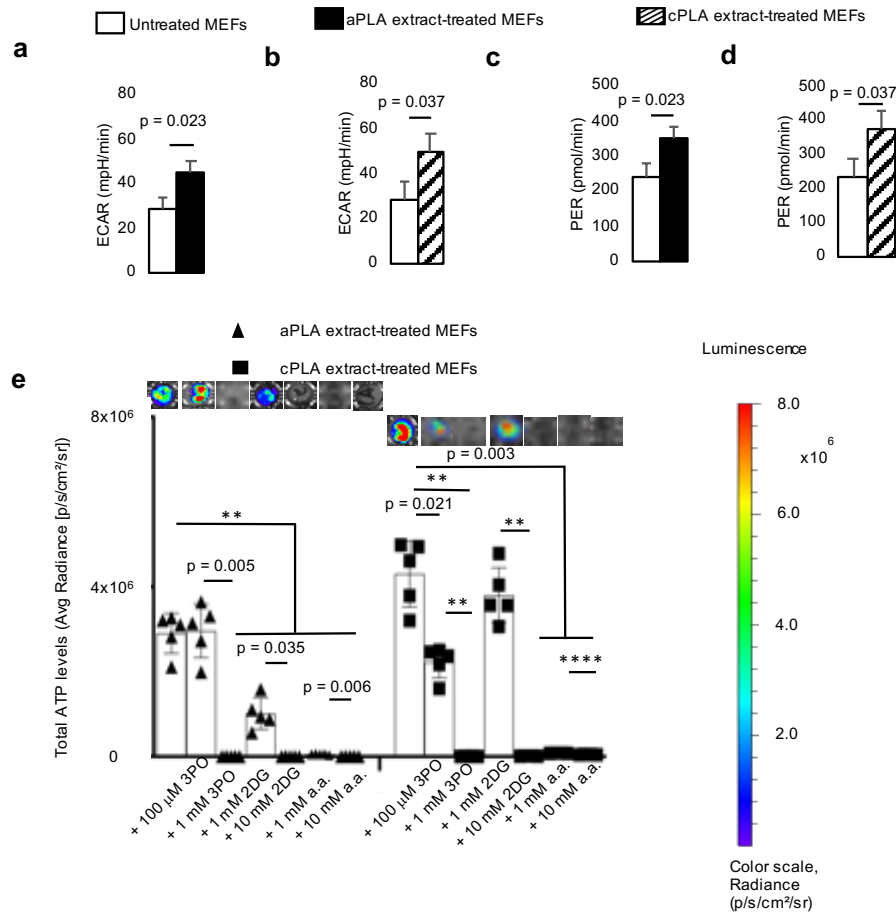

**Figure 4 | Functional metabolism is altered in mouse embryonic fibroblasts (MEFs) after exposure to poly(lactide) (PLA) degradation products (extract).** **a-b**, Following exposure to amorphous PLA (aPLA; **a**) or crystalline PLA (cPLA; **b**) extracts, extracellular acidification rate (ECAR) is increased. **c-d**, Proton efflux rate (PER) is elevated in MEFs after exposure to aPLA (**c**) or cPLA (**d**) extract. **e**, Bioenergetic levels in MEFs exposed to aPLA or cPLA extracts are decreased in a dose-dependent manner by 3-(3-pyridinyl)-1-(4-pyridinyl)-2-propen-1-one (3PO), 2-deoxyglucose (2DG) and aminooxyacetic acid (a.a.; representative wells are shown). \*\*  $p = 0.002$ , \*\*\*\*  $p < 0.0001$ , mean (SD),  $n = 3$  (Fig. 4a, b, c, d),  $n = 5$  (Fig. 4e), two-tailed unpaired t-test or Brown-Forsythe and Welch ANOVA followed by Dunnett's T3 multiple comparisons test; 100  $\mu$ l of control or PLA extract was used for 7 days.

195  
196  
197

### Short- and long-term exposure to L-lactic acid alters bioenergetics and results in metabolic reprogramming

198 As previously reported for short-term hydrolytic degradation of PLA<sup>8</sup>, there was no reduction in  
199 mass of PLA after our 12 d extraction, but there were detectable changes in molecular weight  
200 (Supplementary Table 2). Using the standard D/L-lactic acid enzyme-based determination assays could  
201 not effectively measure levels in serum-containing medium. However, in milliQ water and relative to  
202 controls, we observed a 7.8- and 5.2-fold increase in L-lactic acid in amorphous and crystalline PLA  
203 extracts, respectively, although these increments were not significant (Supplementary Table 3;  
204 Supplementary Fig. 5a-b). Similarly, we observed a 2.7- and 2.8-fold increase in D-lactic acid in amorphous  
205 and crystalline PLA extracts, respectively (Supplementary Table 3). Therefore, we exposed BMDMs to  
206 various doses of L-lactic acid, ranging from 2.5- to 15-fold higher levels in comparison to untreated cells. In

207 addition, we measured corresponding pH levels: Untreated medium (pH = 8.01), 2.5 mM (pH = 7.47), 5 mM  
 208 (pH = 7.19), 10mM (pH = 6.84) and 15mM (pH = 6.65) L-lactic acid-containing DMEM medium.

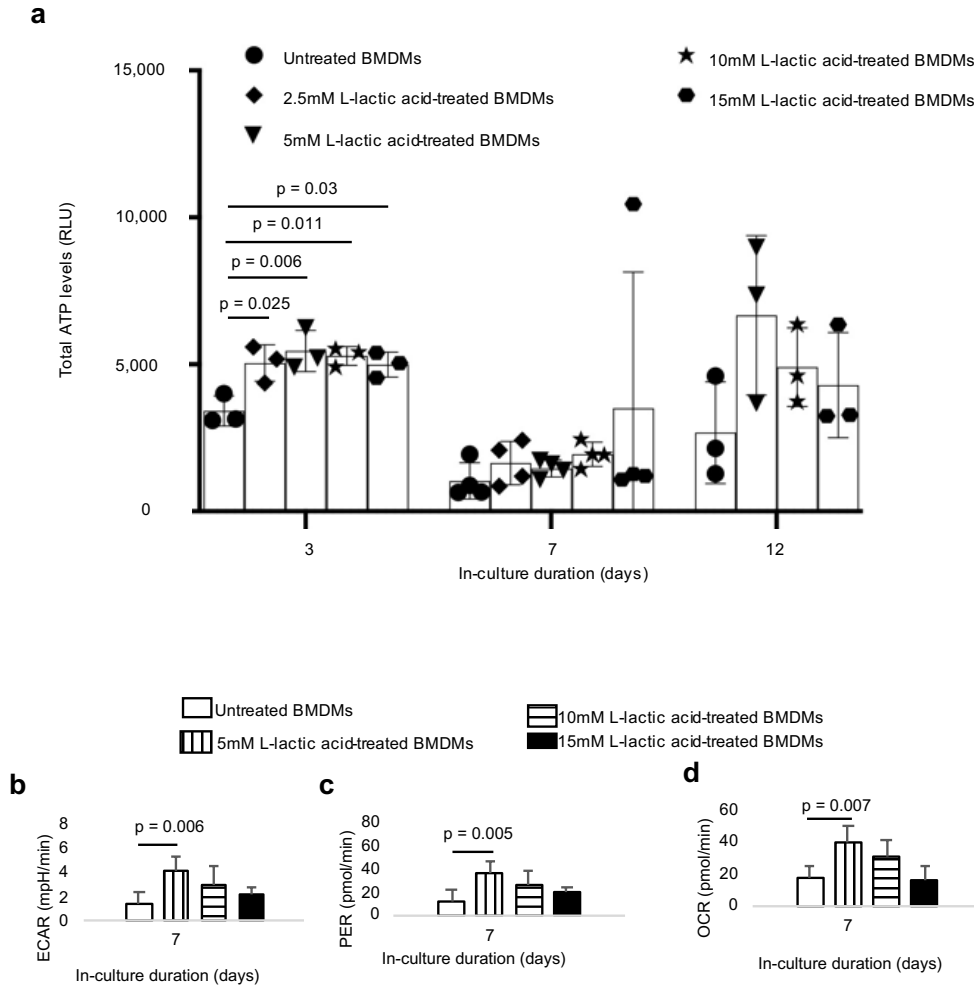

**Figure 5 | Treatment of primary bone marrow-derived macrophages (BMDMs) with L-lactic acid altered bioenergetic (ATP) levels and functional metabolism. a**, Treatment with different doses of monomeric L-lactic acid resulted in changes in ATP levels. **b-d**, Following exposure to L-lactic acid extracellular acidification rate (ECAR, **b**), proton efflux rate (PER, **c**) and oxygen consumption rate (OCR, **d**) are increased. One-way ANOVA followed by Tukey's post-hoc test, mean (SD), n = 34 (Fig. 5a), n = 5 (Fig. 5b, c, d).

209  
 210 We observed that bioenergetic levels are altered in the short-term (day 3; Fig. 5a) for all doses of  
 211 L-lactic acid treatment, resulting in a 1.5 to 1.6-fold increase in ATP levels. After prolonged (day 7) exposure  
 212 to L-lactic acid and even when bioenergetic alterations were not apparent, glycolytic flux (ECAR; Fig. 5b),  
 213 monocarboxylate transporter function (PER; Fig. 5c) and oxidative phosphorylation (OCR; Fig. 5d) were  
 214 increased by 2.8-, 2.8- and 2.3-fold, mechanistically reproducing observations made with amorphous and  
 215 crystalline PLA extracts in our bioenergetic model. Moreover, these changes were not dependent on  
 216 alterations in cell number (Supplementary Fig. 5c). Of note, highly acidic groups (10-15 mM L-lactic acid)  
 217 did not result in reduction in viability of primary macrophages either at day 7 or 12, relative to controls  
 218 (Supplementary Fig. 5c).

219  
 220  
 221



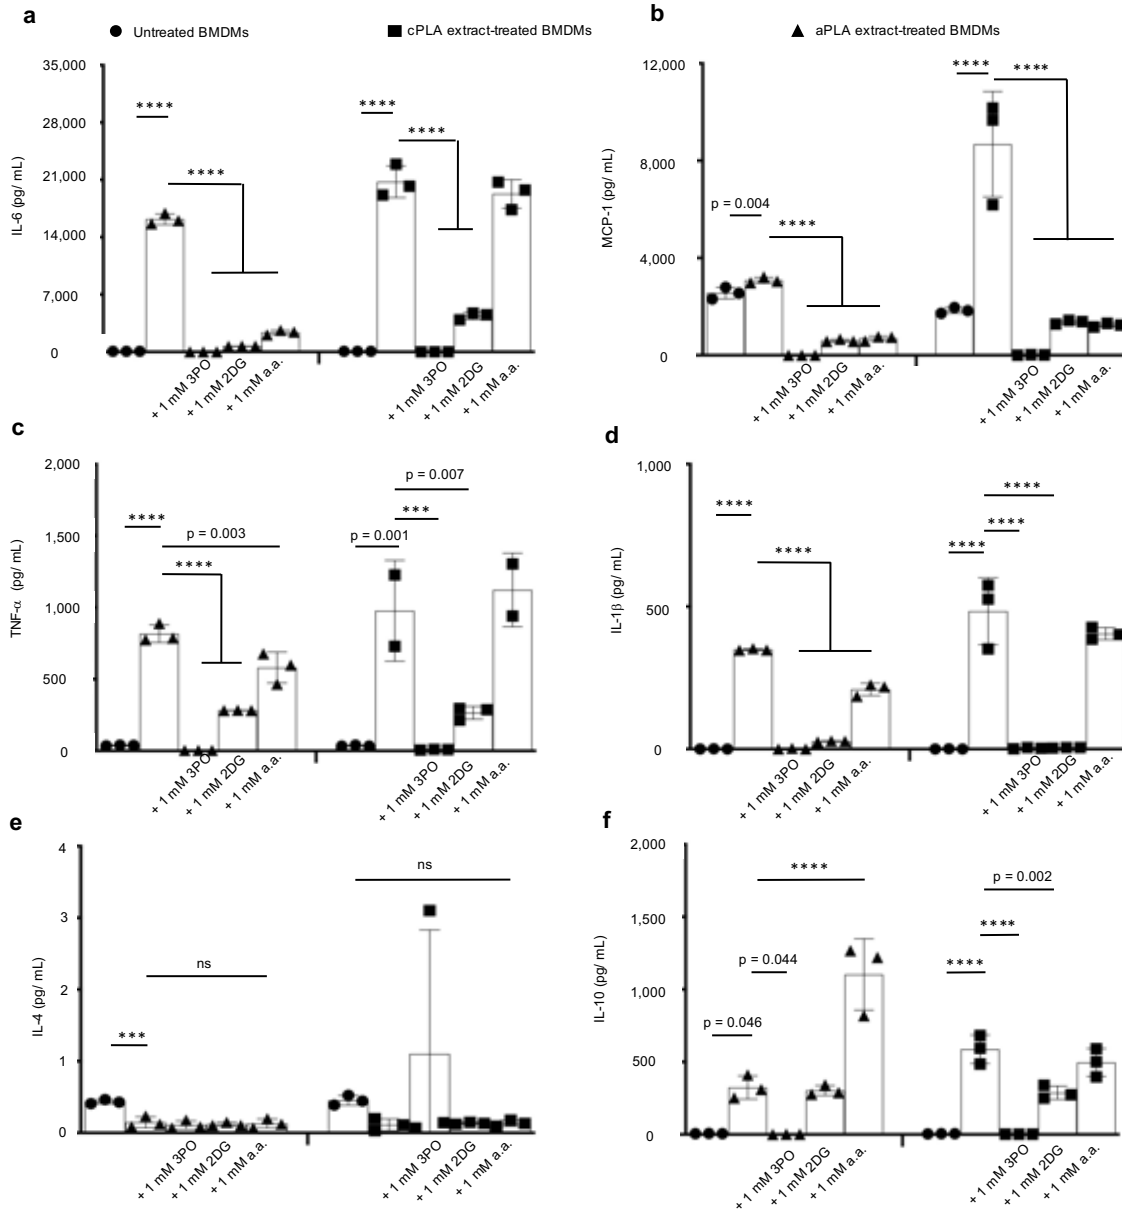

**Figure 6 | In macrophages exposed to PLA breakdown products, glycolytic inhibitors modulate elevated proinflammatory cytokine expression and stimulate or do not reduce anti-inflammatory cytokine levels.** a-d, Following exposure to amorphous PLA (aPLA) or crystalline PLA (cPLA) extract, primary bone marrow-derived macrophages (BMDMs) express elevated levels of IL-6 (a), MCP-1 (b), TNF-α (c) and IL-1β (d) in comparison to untreated BMDMs, and these elevated proinflammatory cytokine levels can be modulated by various small molecule inhibitors of glycolysis. e, Addition of glycolytic inhibitors to PLA does not reduce IL-4 expression. f, Expression of IL-10 is increased by inhibiting glycolysis using aminoxyacetic acid (a.a.) in amorphous PLA. Not significant (ns), \*\*\*p<0.001, \*\*\*\*p<0.0001, mean (SD), n = 3 in all except the cPLA group in TNF-α (Fig. 6c) where n=2-3, one-way ANOVA followed by Tukey's post-hoc test; 3-(3-pyridinyl)-1-(4-pyridinyl)-2-propen-1-one (3PO), 2-deoxyglucose (2DG); 100 μl of aPLA or 150 μl of cPLA extract with corresponding controls were used on day 7.

## 222 Glycolytic inhibition modulates proinflammatory and stimulates anti-inflammatory cytokine 223 expression

224 To determine whether glycolytic inhibition affects proinflammatory (IL-6, MCP-1, TNF-α, IL-1β and  
225 IFN-λ) and anti-inflammatory (IL-4, IL-10, and IL-13) protein expression, we used a magnetic bead-based  
226 chemokine and cytokine assay<sup>39</sup>. We observed that prolonged exposure of primary macrophages to  
227 amorphous and crystalline PLA extracts resulted in 228- and 319-fold increases, respectively, in IL-6 protein  
228 expression (Fig. 6a) compared to untreated macrophages. We confirmed this observation by ELISA

229 (Supplementary Fig. 6a). Similarly, exposure of macrophages to lactic acid resulted in elevated IL-6 protein  
230 expression by 2.3-fold (Supplementary Fig. 6a). Amorphous PLA extracts increased MCP-1 (Fig. 6b), TNF-  
231  $\alpha$  (Fig. 6c) and IL-1 $\beta$  (Fig 6d) levels by 1.2-fold, 21-fold, and 567-fold, respectively. Likewise, crystalline  
232 PLA extracts increased MCP-1 (Fig. 6b), TNF- $\alpha$  (Fig. 6c) and IL-1 $\beta$  (Fig 6d) levels by 4.7-fold, 27-fold, and  
233 1,378-fold, respectively. Abnormally increased levels of IL-6, MCP-1, TNF- $\alpha$  and IL-1 $\beta$  were modulated by  
234 addition of 3PO, 2DG or a.a. (Fig. 6a-d). Increased MCP-1 levels in macrophages also occurred after  
235 exposure to L-lactic acid (Supplementary Fig. 6b). Levels of IFN- $\gamma$  and IL-13 were unchanged by PLA  
236 extract (data not shown) but exposure to amorphous PLA extract decreased IL-4 protein levels by 3-fold  
237 (Fig. 6e) relative to untreated macrophages. Remarkably, with the exception of 3PO, IL-10 expression was  
238 either unchanged (crystalline PLA) or increased by 3.4-fold (amorphous PLA) upon addition of a.a. (Fig. 6f)  
239 relative to macrophages exposed to PLA extract.

240

### 241 **Increased radiolabeled glucose uptake occurs in the PLA microenvironment and drives** 242 **inflammation, in-vivo**

243 Taken together, our in-vitro data suggest that metabolic changes drive inflammation arising from  
244 PLA degradation. To test this hypothesis in-vivo, we incorporated 2DG into amorphous PLA (aPLA) by  
245 melt-blending at 190 °C and compared to aPLA which had been subjected to similar melt-blending  
246 conditions (called reprocessed aPLA). Following melt-blending, extruded (sterile) filaments (1.75 mm  
247 diameter, 1 mm long) were subcutaneously implanted on the back (dorsum) of mice. Sham controls  
248 underwent similar surgical exposures but were not implanted with any materials. After 6 weeks, mice were  
249 injected with F-18 fluorodeoxyglucose (FDG) and euthanized; using FDG allows for evaluation of metabolic  
250 reprogramming and inflammation<sup>40,41</sup>. Thereafter, circular biopsies (12 mm in diameter) of full thickness  
251 skin containing implants were assayed for radioactivity using a gamma counter. Compared to sham  
252 controls, skin containing reprocessed aPLA implants had 1.35-fold increase in FDG uptake, which was  
253 abolished in skin containing aPLA+2DG implants (Fig. 7a).

254 Next, we sought to determine the effect of glycolytic inhibition on recruitment and activation states  
255 of macrophages and fibroblasts. To compare the effects of glycolytic inhibition to neutralization techniques,  
256 we included a group where hydroxyapatite (HA) was incorporated in aPLA<sup>10,42</sup>. Hematoxylin and eosin  
257 staining revealed the presence of inflammatory infiltrates in the implant microenvironment (reprocessed  
258 aPLA, aPLA+2DG, aPLA+HA) compared to sham controls, suggesting persistent inflammation  
259 (Supplementary Fig. 7).

260 Chronic inflammation to PLA is principally driven by recruited macrophages<sup>12,23</sup>. Therefore, we  
261 stained for CD11b and F4/80, established macrophage markers. Compared to sham controls, aPLA  
262 resulted in a 1.7- and 2.2-fold increase in CD11b and F4/80 intensities, respectively (Fig. 7b-c;  
263 Supplementary Fig. 8). Unlike aPLA+2DG, aPLA+HA increased CD11b and F4/80 intensities by 2.6-fold  
264 and 2.2-fold, respectively, when compared to sham controls (Fig. 7b-c). Of note, there was no significant  
265 difference in CD11b and F4/80 intensities between aPLA and aPLA+2DG (Fig. 7b-c), suggesting similar  
266 levels of macrophage recruitment. Furthermore, aPLA+2DG revealed 2.3-fold and 1.7-fold less CD11b and  
267 F4/80 intensities, respectively, compared to aPLA+HA (Fig. 7b-c). To determine the activation states of  
268 recruited macrophages, we stained for CD206 and CD86, anti-inflammatory and proinflammatory  
269 macrophage markers, respectively<sup>43</sup>. Relative to other groups, only aPLA+HA increased CD206 intensity  
270 (Fig. 7d; Supplementary Fig. 8), consistent with the bioactivity of HA<sup>44</sup>. We observed a 1.8-fold increase in  
271 CD86 intensity with reprocessed aPLA compared to sham controls, consistent with the proinflammatory  
272 effects of aPLA (Fig. 7e; Supplementary Fig. 8). Compared to reprocessed aPLA, aPLA+2DG and not  
273 aPLA+HA decreased CD86 intensity (Fig. 7e). In fact, there was a 1.4-fold decrease in CD86 intensity in  
274 aPLA+2DG compared to aPLA+HA (Fig. 7e).

275 Fibroblasts are a key cellular player of excessive fibrosis around PLA implants<sup>12,23</sup>, and their  
276 activation in myofibroblast phenotype is marked by  $\alpha$ -SMA and TGF- $\beta$  expression<sup>45</sup>. We observed a 1.4-  
277 fold increase in  $\alpha$ -SMA intensity with reprocessed PLA compared to sham controls, which was decreased  
278 in the aPLA+2DG, but not aPLA+HA group (Fig. 8a; supplementary Fig. Supplementary Fig. 9). With TGF-  
279  $\beta$  intensity, aPLA+HA was elevated relative to other groups (Fig. 8b; Supplementary Fig. 9). Compared to  
280 aPLA+HA, aPLA+2DG revealed 1.4-fold and 1.8-fold decrease in  $\alpha$ -SMA and TGF- $\beta$  intensities,  
281 respectively (Fig. 8b).

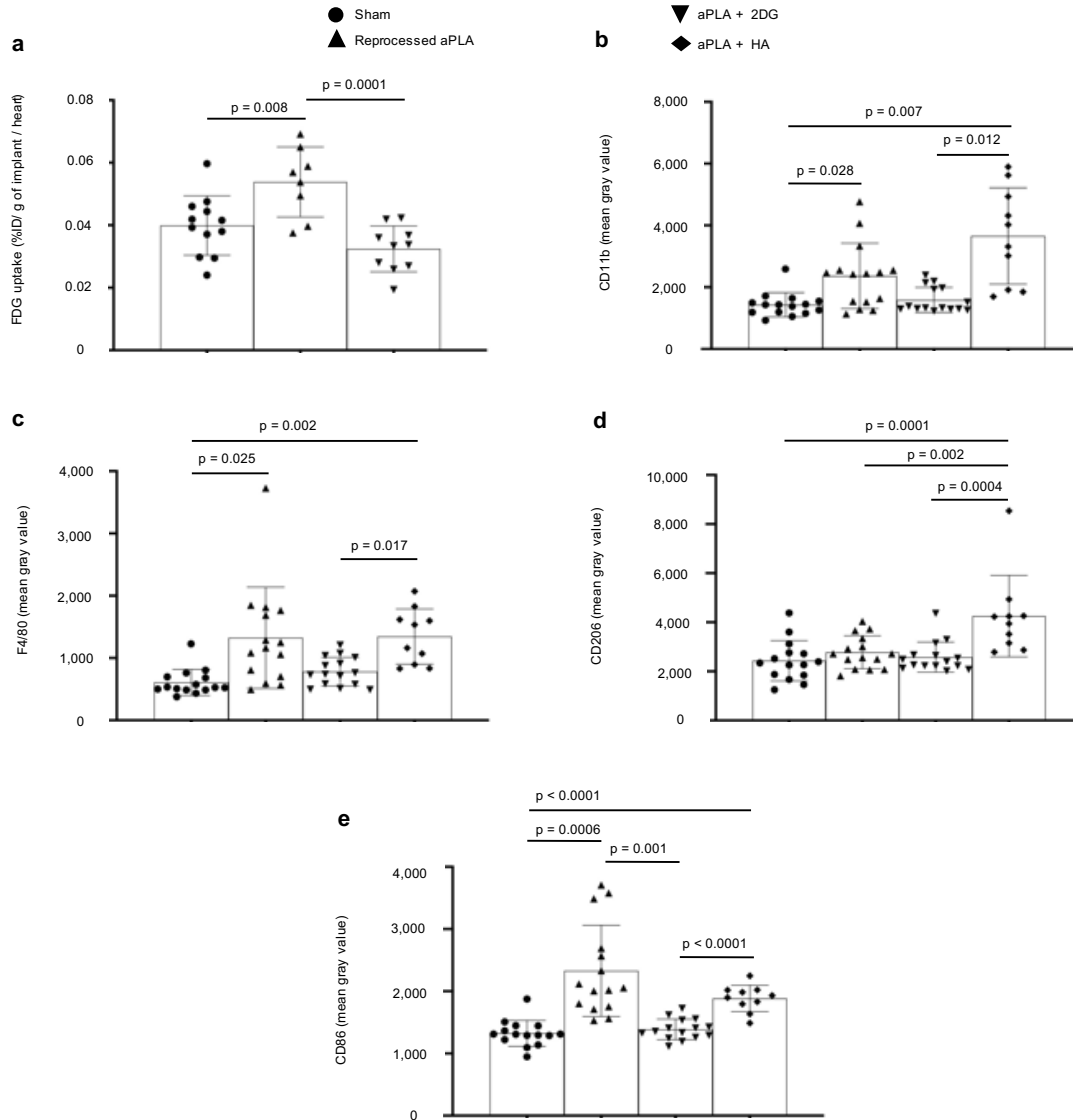

**Figure 7 | Increased radiolabeled glucose uptake occurs in the poly(lactide) (PLA) microenvironment and drives inflammation in-vivo.** a, When normalized to heart values, percent injected dose per gram (% ID/ g) of biopsied tissues surrounding amorphous PLA (aPLA) implants show higher F-18 fluorodeoxyglucose (FDG) uptake compared to sham controls; increased FDG uptake is reduced by incorporation of 2-deoxyglucose (2DG). b-c, Compared to sham controls, mean fluorescence intensity of CD11b (b) or F4/80 (c) is increased following surgical implantation of aPLA or a combination of aPLA and hydroxyapatite (HA), but not a combination of aPLA and 2DG. d, Compared to other groups, CD206 mean fluorescence intensity is increased in aPLA + HA. e, Compared to sham controls, CD86 mean fluorescence intensity is increased following implantation of aPLA; elevated CD86 is decreased by incorporating 2DG but not HA. Mean (SD); Fig. 1a, sham (n = 12), aPLA (n = 8), aPLA + 2DG (n = 10); Fig 1b-e, sham (n = 15), aPLA (n = 15), aPLA + 2DG (n = 15), aPLA + HA (n = 10); one-way ANOVA followed by Tukey's post-hoc test or Brown-Forsythe and Welch ANOVA followed by Dunnett's T3 multiple comparison test; refer to methods section (In-vivo studies, tissue processing and analyses) for more information on n.

282  
283

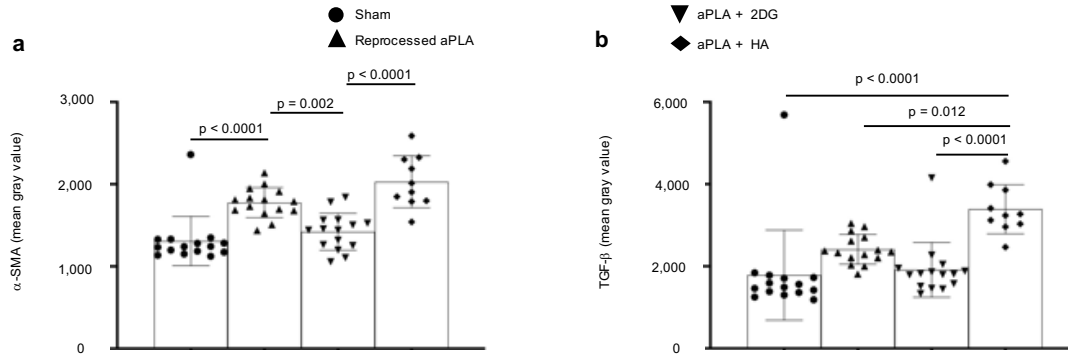

**Figure 8 | Activation of fibroblasts in the polylactide (PLA) microenvironment is regulated by immunometabolism.** a, Compared to sham controls, mean fluorescence intensity of alpha-smooth muscle actin ( $\alpha$ -SMA) is increased following surgical implantation of amorphous PLA (aPLA) or a combination of aPLA and hydroxyapatite (HA), but not a combination of aPLA and 2-deoxyglucose (2DG). b, Compared to other groups, mean fluorescence intensity of transforming growth factor-beta (TGF- $\beta$ ) is increased in aPLA + HA. Mean (SD); sham (n = 15), aPLA (n = 15), aPLA + 2DG (n = 15), aPLA + HA (n = 10); one-way ANOVA followed by Tukey's post-hoc test; refer to methods section (In-vivo studies, tissue processing and analyses) for more information on n.

284

285

## Discussion

286

287

288

289

290

291

292

293

294

295

296

297

298

299

300

301

302

303

304

305

306

307

308

309

310

311

312

313

314

315

316

317

318

319

320

We describe a bioenergetic model of immune cell activation to PLA degradation, revealing that altered bioenergetics and metabolic reprogramming underlie adverse responses, including persistent inflammation and excessive fibrosis, to PLA breakdown products. For decades, the hypothesis in regenerative medicine has been that acidity drives immune cell activation to PLA degradation<sup>10</sup>. However, this observation was founded on correlation and not causation<sup>11,21</sup>. Consequently, methods based on neutralizing acidity have been inadequate in controlling adverse responses to PLA degradation<sup>7,16</sup>.

Importantly, our in-vitro model extends the short time periods that have been previously studied<sup>46</sup>. By adapting our bioenergetic model for high throughput analysis, we observed delayed immune cell changes not apparent in the short-term. In patients, PLA slowly degrades into oligomers and monomers of lactic acid. Ultimately, due to bulk degradation, PLA breakdown exceeds immune cellular clearance, resulting in accumulation of oligomers and monomers of lactic acid<sup>25</sup>. We illustrate that only after prolonged exposure to PLA degradation products do fibroblasts and macrophages become activated. Mechanistically, PLA degradation not only alters bioenergetic homeostasis in immune cells, it results in metabolic reprogramming. We identified PLA degradation products to include monomeric L-lactic acid and reproduced bioenergetic alterations and metabolic reprogramming using monomeric L-lactic acid. Although not shown, we also identified a spectrum of different oligomeric lactic acid in extracts by electrospray ionization-mass spectrometry as previously reported<sup>47</sup>. Following prolonged exposure of macrophages to PLA degradation products, metabolic reprogramming is characterized by concomitantly elevated oxidative phosphorylation and glycolysis, resulting in increased IL-6, MCP-1, TNF- $\alpha$  and IL-1 $\beta$  protein expression, potent proinflammatory cytokines. Increased glycolysis, a fundamental proinflammatory metabolic phenotype, is likely mediated by HIF-1 $\alpha$ <sup>36</sup>. Human fibroblasts in lactate-enriched medium stabilize HIF-1 $\alpha$  resulting in increased glycolysis<sup>48</sup> which underlies activation of fibroblasts in several profibrotic pathologies<sup>19</sup>. Similarly, increased oxidative phosphorylation is required for macrophages to function as antigen presenting cells as part of inflammation<sup>49</sup> or its resolution<sup>20</sup>.

Inhibiting different steps in the glycolytic pathway produced similar effects, decreasing proinflammatory cytokine expression by modulating metabolic reprogramming and altered bioenergetics. Unlike bacterial LPS-mediated glycolytic reprogramming that is uniquely dependent on IL-1 $\beta$ <sup>36</sup>, PLA degradation products additionally affect IL-6, MCP-1 and TNF- $\alpha$ . Of note, modulating proinflammatory cytokine expression using aminooxyacetic acid stimulated IL-10 protein expression, an anti-inflammatory cytokine<sup>34</sup>. Collectively, these findings are important for at least four reasons. First, it explains the "Oppenheimer phenomenon", where long-term PLA implantation results in neoplasia in some humans and up to 80% of rodents<sup>6</sup> since IL-6 directly links persistent inflammation from PLA to cellular transformation<sup>50</sup>. Second, stimulating IL-10 is critical to tissue repair by driving wound resolution and angiogenesis<sup>51</sup>. In fact, IL-10 is a key immunomodulatory cytokine secreted by mesenchymal stem cells<sup>52</sup>, and is crucial in macrophage-stem cell crosstalk<sup>53,54</sup> for tissue engineering. Third, macrophages that have normal

321 metabolism are unaffected by the small molecule inhibitors studied. In fact, cytotoxicity is selective for  
322 macrophages having altered metabolism, following exposure to PLA degradation products, making this  
323 technique particularly desirable. Fourth, it provides a basis to study lactate signaling in tumor initiation, with  
324 the potential to stop neoplastic initiation.

325 In cell culture medium used in our studies, serum and high bicarbonate salts buffered the pH of  
326 PLA degradation products, excluding pH as a confounder of observed metabolic cellular changes.  
327 Furthermore, using monomeric L-lactic acid at various concentrations that simulated neutralized and acidic  
328 PLA degradation products, we similarly observed bioenergetic alterations, excluding pH as a confounder.  
329 Lastly, using aminooxyacetic acid to modulate some adverse responses to PLA degradation products,  
330 suggests that acidity is not solely the driver of immune cellular activation to PLA.

331 Our findings using sterile implants present a perspective different than what is observed with  
332 bacterial endotoxin (LPS). Within 1h of exposure to very low endotoxin concentrations, significant metabolic  
333 changes characterized by increased glycolysis and decreased oxidative phosphorylation occurs<sup>35</sup>; with PLA  
334 degradation products, we only observed changes after several days of exposure, with distinct metabolism.  
335 Importantly, LPS decreases ATP levels<sup>35,55</sup>; in contrast, PLA degradation products (including monomeric L-  
336 lactic acid) increase ATP levels as shown in this study. Lastly, unlike PLA degradation products, LPS-  
337 mediated glycolytic reprogramming is reliant on IL-1 $\beta$  signaling<sup>36</sup>.

338 Lactate is a signaling molecule in immunity<sup>56</sup> and cancer progression<sup>57-59</sup>. Its role when combined  
339 with LPS is conflicting, with reports of proinflammatory and anti-inflammatory effects<sup>60,61</sup>. However, a stand-  
340 alone ability of lactate to activate immune cells is novel, as prior inflammatory and cancer models did not  
341 simulate prolonged exposure times, a critical feature of the cancer and immune microenvironments.

342 Amorphous PLA which undergoes faster hydrolytic degradation than crystalline PLA results in  
343 quicker onset of metabolic reprogramming. Nonetheless, crystalline PLA does eventually result in metabolic  
344 remodeling and altered bioenergetics. Furthermore, our data implicate monocarboxylate transporters which  
345 mediate the bi-directional flux of lactate across cell membranes<sup>33,60</sup>.

346 Glucose is the first substrate in glycolysis. As such, radiolabeled glucose (FDG) uptake is often  
347 used to measure glycolytic dependence, in-vivo, such as in some cancers or inflammatory disorders where  
348 enhanced glycolysis is pivotal to disease progression<sup>62</sup>. We observed increased glycolytic dependence in  
349 the PLA inflammatory microenvironment using sterile amorphous PLA, which was abrogated by 2DG, one  
350 of the glycolytic inhibitors applied in our in-vitro studies. Unsurprisingly, after surgical resection of colorectal  
351 and cervical tumors in human patients, chronic, sterile inflammation from PLA-based adhesion barriers  
352 elevate FDG uptake, falsely mimicking cancer recurrence<sup>63,64</sup>.

353 Surprisingly, 2DG did not significantly reduce macrophage recruitment as measured by expression  
354 of CD11b or F4/80 in the PLA microenvironment. However, 2DG reduced macrophage activation into a  
355 proinflammatory phenotype (CD86), likely by competing with radiolabeled glucose for binding to  
356 hexokinase<sup>36</sup>, thereby inhibiting the first step in glycolysis. Since hydroxyapatite (HA) is often used to  
357 neutralize acidity from PLA degradation<sup>10</sup>, we compared effects of incorporating similar amounts (w/w) of  
358 HA to 2DG toward clinical translation of techniques targeting metabolism. Compared to 2DG, we observed  
359 increased pro-regenerative macrophage expression (CD206) with HA, which is consistent with the  
360 bioactivity of ceramic biomaterials<sup>44</sup>, opening the possibility of combinatorial strategies for regenerative  
361 applications. Corroborating CD206 results, our in-vitro data showed that neither 2DG nor 3PO, as a  
362 glycolytic inhibitor for PLA-based application, increases IL-4 or IL-10.

363 Compared to inhibiting glycolysis using 2DG, neutralizing acidity using HA increased macrophage  
364 recruitment and proinflammatory polarization, suggesting that metabolism and not acidity, is at the center  
365 of adverse immune responses to bulk PLA implants and PLA degradation products. Contrary to some  
366 studies, an explanation for the inability of HA to reduce inflammation in our study could be the amount used.  
367 Whereas the w/w concentration of HA present in our fabricated composites was 2 % for direct comparison  
368 to 2DG, greater than 20 % HA concentrations are more often used<sup>65,66</sup>. However, it is noteworthy that 2%  
369 HA resulted in significantly increased CD206 expression, suggesting pharmacological efficacy, yet could  
370 not reduce CD86 expression. Furthermore, unlike in soft tissue regeneration, enhanced mechanical  
371 properties of implants having more concentration of or comprising of only HA is desirable for bone tissue  
372 engineering<sup>65,66</sup>.

373 Increased fibroblast activation, measured by  $\alpha$ -SMA expression, in the PLA microenvironment was  
374 reduced by inhibiting glycolysis using 2DG and not neutralizing acidity using HA. Compared to HA, 2DG  
375 reduced both  $\alpha$ -SMA and TGF- $\beta$  expression, suggesting that underlying metabolism regulates fibroblast  
376 activation in the PLA microenvironment. In agreement, metabolic reprogramming is known to play a key  
377 role in profibrotic disorders, activating fibroblasts<sup>19</sup>.

378 Most, if not all, publications on PLA's biomedical application include a statement indicating that  
379 PLA breakdown products are metabolized through the tricarboxylic acid cycle. However, not until this study  
380 has it been demonstrated that bioenergetic changes occur in response to PLA. This key observation will  
381 redirect the field of tissue engineering, by offering an opportunity to intervene in this response. It opens up  
382 the possibilities to computationally identify relevant small molecules that could be clinically deployed,  
383 embedded in PLA implants, to mitigate adverse responses after carefully tuning drug release profiles.  
384 Moreover, use of PLA composites with ceramics could be optimized by combining the benefits of metabolic  
385 reprogramming with bioactivity of ceramics for bone tissue engineering. Beyond its ability to inhibit uptake  
386 of glycolytic substrates, related glutamine metabolic pathways, affected by aminooxyacetic acid could be  
387 explored for driving pro-regenerative macrophage response<sup>67</sup>.

388 Taken together, our findings suggest a model where PLA degradation products, including  
389 monomers of L-lactic acid, mechanistically remodel metabolism in cells of the immune microenvironment.  
390 This mechanism is specific and leads to increased proinflammatory cytokine and marker expression which  
391 can be modulated while stimulating anti-inflammatory cytokines. Our approach will enhance the  
392 biocompatibility and safety of biomaterials, including PLA-based implants for soft- and hard-tissue  
393 regeneration, significantly advancing tissue engineering.

394

## 395 **Methods**

396 **Poly lactide (PLA) materials and extraction.** Highly crystalline PLA 3100HP and amorphous PLA 4060D  
397 (both from NatureWorks LLC) were used after their physicochemical and thermal properties were  
398 authenticated (Supplementary Table 1). PLA was sterilized by exposure to ultraviolet radiation for 30  
399 minutes<sup>25</sup>. Afterwards, breakdown products (extracts)<sup>21</sup> of PLA were obtained by suspending 4 g of PLA  
400 pellets in 25 ml of complete medium. Complete medium comprised of DMEM medium, 10% heat-inactivated  
401 Fetal Bovine Serum and 100 U/mL penicillin-streptomycin (all from ThermoFisher Scientific). PLA was  
402 extracted for 12 days in an orbital shaker at 250 rpm and 37 °C, after which extracts were decanted and  
403 extract's pH measured. Either 100 or 150  $\mu$ l of extract (specified in each figure legend) was used per well  
404 of a flat-bottom 96-well plate; each volume was made up to 200  $\mu$ l, as final volume, using freshly made  
405 complete medium.

406

407 **Bioenergetic assessment.** Bioluminescence was measured using the IVIS Spectrum in vivo imaging  
408 system (PerkinElmer) after adding 150  $\mu$ g/mL of D-luciferin (PerkinElmer). Living Image (Version 4.5.2,  
409 PerkinElmer) was used for acquiring bioluminescence on the IVIS Spectrum. Standard ATP/ADP kits  
410 (Sigma-Aldrich) containing D-luciferin, luciferase and cell lysis buffer were used to according to  
411 manufacturer's instructions. Luminescence at integration time of 1000 ms was obtained using the  
412 SpectraMax M3 Spectrophotometer (Molecular Devices) using SoftMax Pro (Version 7.0.2, Molecular  
413 Devices).

414

415 **pH measurements.** The pH of extracts was assessed using an Orion Star A111 Benchtop pH Meter  
416 (ThermoFisher Scientific) under room temperature conditions (20 °C).

417

418 **Microscopy.** Z-stack microscopy was accomplished by using the DeltaVision deconvolution imaging  
419 system (GE Healthcare) and softWoRx software (Version 7.2.1, GE Healthcare) at excitation and emission  
420 wavelengths of 525 and 558 nm, respectively for FITC. Section thickness of 0.2  $\mu$ m for 64 to 128 sections  
421 were obtained at 40x and 100x magnification while imaging. Chambered Coverglass (Nunc Lab-Tek II) was  
422 used to seed 20,000 BGL cells (see cells below), keeping similar ratios as in a 96-well plate for volume of  
423 PLA extracts to volume of fresh medium.

424

425 **Glucose measurement.** Glucose levels in complete medium was evaluated by a hand-held GM-100  
426 glucose meter (BioReactor Sciences) after validation (Supplementary Fig. 1b) according to manufacturer's  
427 instruction.

428  
429 **Cells.** Mouse embryonic fibroblast cell line (NIH 3T3 cell line; ATCC) and murine primary bone-marrow  
430 derived macrophages (BMDMs) were used. In each experiment, either 5,000 fibroblasts or 50,000 BMDMs  
431 were initially seeded. BMDMs were sourced from male and female C57BL/6J mice (Jackson Laboratories)  
432 of 3-4 months<sup>30,35</sup>. NIH 3T3 cells were stably transfected with a Sleeping Beauty transposon plasmid  
433 (pLuBIG) having a bidirectional promoter driving an improved firefly luciferase gene (fLuc) and a fusion  
434 gene encoding a Blasticidin-resistance marker (BsdR) linked to eGFP (BGL)<sup>26</sup>; enabling us to  
435 simultaneously monitor morphological and bioenergetic changes in live cells<sup>68,69</sup>. All cells were cultured in  
436 a total of 200  $\mu$ l complete medium with volumes of extracts specified in figure legends.

437  
438 **Materials.** 3-(3-pyridinyl)-1-(4-pyridinyl)-2-propen-1-one (MilliporeSigma), 2-deoxyglucose  
439 (MilliporeSigma) and aminooxyacetic acid (Sigma-Aldrich) were used for glycolytic inhibition and L-lactic  
440 acid (Sigma-Aldrich) was used at various concentrations to reproduce the effects of PLA degradation  
441 products. Each of these materials were made in complete medium before adding to wells of a 96-well plate.  
442

443 **Cell viability.** Cell viability was assessed using the crystal violet staining assay<sup>29</sup>, at room temperature, as  
444 an end-point measure of total biomass generated over the course of the culture period. Briefly, out of 200  
445  $\mu$ l of medium per well, 150  $\mu$ l is discarded. To each well, 150  $\mu$ l of 99.9 % methanol (MilliporeSigma) is  
446 added for 15 mins to kill and fix the cells, then discarded. Afterwards, 100  $\mu$ l of 0.5 % crystal violet (25 %  
447 methanol) is added for 20 mins, then the wells are emptied. Each well is washed twice with 200  $\mu$ l of  
448 phosphate buffered saline for 2 mins. Absorbance (optical density) was acquired at 570 nm using the the  
449 SpectraMax M3 Spectrophotometer (Molecular Devices) and SoftMax Pro software (Version 7.0.2,  
450 Molecular Devices).

451  
452 **Functional metabolism.** Basal measurements of oxygen consumption rate (OCR), extracellular  
453 acidification rate (ECAR) and lactate-linked proton efflux rate (PER) were obtained in real-time using the  
454 Seahorse XFe-96 Extracellular Flux Analyzer (Agilent Technologies)<sup>34-36</sup>. Prior to running the assay, cell  
455 culture medium was washed with and replaced by the Seahorse XF DMEM medium (pH 7.4) supplemented  
456 with 25 mM D-glucose and 4 mM Glutamine. The Seahorse plates were equilibrated in a non-CO<sub>2</sub> incubator  
457 for an hour prior to the assay. The Seahorse ATP rate and cell energy phenotype assays were run according  
458 to manufacturer's instruction and all reagents for the Seahorse assays were sourced from Agilent  
459 Technologies. Wave software (Version 2.6.1) was used to export Seahorse data directly as means  $\pm$   
460 standard deviation (SD).

461  
462 **Chemokine and cytokine measurements.** Cytokine and chemokine levels were measured using a  
463 MILLIPLEX MAP mouse magnetic bead multiplex kit (MilliporeSigma)<sup>39</sup> to assess for IL-6, MCP-1, TNF- $\alpha$ ,  
464 IL-1 $\beta$ , IL-4, IL-10, IFN- $\lambda$  and 1L-13 protein expression in supernatants. Data was acquired using Luminex  
465 200 (Luminex Corporation) by the xPONENT software (Version 3.1, Luminex Corporation). Using the  
466 glycolytic inhibitor, 3PO, expectedly decreased cytokine values to < 3.2 pg/ mL in some experiments. For  
467 statistical analyses, those values were expressed as 3.1 pg/ mL. Values exceeding the dynamic range of  
468 the assay, in accordance with manufacturer's instruction, were excluded. Additionally, IL-6 ELISA kits  
469 (RayBiotech) for supernatants were used according to manufacturer's instructions.

470  
471 **D/L-lactic acid determination assays.** Measurements of L- and D-lactic acid were using standard D- and  
472 L-lactate assay kits (Sigma-Aldrich) according to manufacturer's instruction after optimization  
473 (Supplementary Fig. 5a-b). Negative absorbance values which were outside the dynamic range for the  
474 assay were excluded during analysis.

475  
476 **Optical rotation.** Polarimetry was used to characterize the L-content and optical purity of the PLA samples  
477 with a P-2000 polarimeter (Jasco) by the Spectra Manager software (Version 2.13.00, Jasco). The optical

478 rotation,  $[\alpha]_{25}$ , was measured and averaged for three samples of each polymer in chloroform (Omnisolv), at  
479 a concentration of 1 g/mL. Conditions were set at 25 °C and 589 nm wavelength. Sucrose was used as a  
480 standard reference material, and its specific optical rotation was reported as approximately 67 °.

481  
482 **Gel permeation chromatography.** Gel permeation chromatography (GPC) was conducted to characterize  
483 the polymer molecular weights using a 600 controller (Waters) equipped with Optilab T-rEX refractive index  
484 (RI) and TREOS II multi-angle light scattering (MALS) detectors (Wyatt Technology Corporation), and a  
485 PLgel 5 $\mu$ m MIXED-C column (Agilent Technologies) with chloroform eluent (1 mL/min). ASTRA software  
486 (Version 7.3.2.21, Wyatt Technology Corporation) was used. Polystyrene standards (Alfa Aesar) with  $M_n$   
487 ranging from 35,000 to 900,000 Da were used for calibration.

488  
489 **Differential scanning calorimetry.** Differential scanning calorimetry (DSC) was conducted with a DSC  
490 Q20 (TA Instruments) to analyse the melting temperature ( $T_m$ ), glass transition temperature ( $T_g$ ), and  
491 percent crystallinity of the PLA grades. Thermal Advantage software (Version 5.5.23, TA Instruments) was  
492 used. Temperature was first equilibrated to 0 °C, then ramped up to 200 °C at a heating rate of 10 °C/min;  
493 temperature was then held isothermally for 5 minutes. Afterwards, the sample was cooled back to 0 °C at  
494 a rate of 10 °C/min, then held isothermally for 2 minutes. Finally, the material was heated back to 200 °C  
495 at 10 °C/min.

496  
497 **In-vivo studies, tissue processing and analyses.** Amorphous PLA was compounded with 2DG at 190  
498 °C for 3 mins in a DSM 15 cc mini-extruder (DSM Xplore) and pelletizer (Leistritz Extrusion Technology).  
499 Our in-vitro studies indicate 1 mM 2DG to be an effective concentration. Accordingly, we estimated that 189  
500 mg of 2DG in 10 g of amorphous PLA will approximate effective concentrations after accounting for potential  
501 thermal degradation of 2DG, converting mM to w/w values<sup>70</sup>. We compounded comparable amounts (200  
502 mg) of hydroxyapatite (HA; 2.5  $\mu$ m<sup>2</sup> particle sizes<sup>42</sup>; Sigma-Aldrich) in 10 g of amorphous PLA under the  
503 same melt-blending thermal conditions. To exclude the effect of melt-blending as a confounder in our  
504 studies, amorphous PLA controls were processed under the same thermal conditions to make  
505 “reprocessed” amorphous PLA. Pellets from melt-blending were made into 1.75 mm diameter filaments  
506 using an extruder (Filabot EX2) at 170 °C with air set at 93. For surgical implantation, amorphous PLA  
507 filaments were cut into 1 mm lengths; four biomaterials were subcutaneously implanted on the dorsum  
508 (back) of each mouse, with two cranially (2.5 cm apart) and two caudally (2.5 cm apart)<sup>12</sup>.

509  
510 Two-month old female C57BL/6J mice ( $n = 3$  mice per group) with an average weight of 19 g were used  
511 according to procedures approved by the Institutional Animal Care and Use Committee at Michigan State  
512 University (PROTO202100327). Mice were anesthetized using isoflurane (2-3 %). The back of each mouse  
513 was shaved and alternate iodine and alcohol swabs were used as skin disinfectants. Aseptic surgery  
514 consisted of incisions through the skin into the subcutis, where biomaterials were inserted into a pouch  
515 made with forceps. Afterwards, surgical glue (3M Vetbond) was used to appose the skin. Each mouse  
516 received intraperitoneal or subcutaneous pre- and post-operative meloxicam (5 mg/kg) injections as well  
517 as postoperative saline. Sham controls underwent the same procedure without biomaterial implantation.  
518 After 6 weeks, the dorsum of mice was shaved to visibly observe sites of surgical implantation. Thereafter,  
519 mice were intraperitoneally injected with 4.82 MBq F-18 fluorodeoxyglucose (Cardinal Health) in 200  $\mu$ l. At  
520 65 mins post-dose, mice were euthanized and blood drawn from their hearts. Circular biopsies (12 mm  
521 diameter) of full skin thickness, with visible implants in the center, were recovered. Similar sized biopsies  
522 were collected from mice in the sham group in the region where surgical incision was made. Biomaterial  
523 migration from subcutaneous sites only allowed for the recovery of most and not all implants. As such, for  
524 obtaining data on the gamma counter (Fig. 7a), there were 12 skin biopsies from 3 mice in the sham group,  
525 8 skin biopsies from 3 mice (amorphous PLA group) and 10 skin biopsies from 3 mice (amorphous + 2DG  
526 group). Skin biopsies, blood sample and heart organs were weighed, with only skin samples fixed in 4%  
527 paraformaldehyde (PFA). Activity in all samples was assessed via gamma counter (Wizard 2, Perkin Elmer)  
528 once decayed to a linear range. All injected doses and gamma counter measurements were decay-  
529 corrected to the same timepoint to calculate the percent of injected dose taken up per gram of assessed  
530 tissue (% ID / g; Fig. 7a).



531  
532 For tissue staining, one skin biopsy per mouse was passed through increasing concentration of 10 %, 20  
533 % and 30 % sucrose, daily. Using 99.9% methanol (Sigma-Aldrich) on dry ice, tissues were embedded in  
534 optimal cutting temperature (O.C.T.) compound (Tissue-Tek) by snap freezing. After equilibration at -20 °C,  
535 multiple successive 8  $\mu\text{m}$  sections were obtained using a microtome-cryostat. Sections were routinely  
536 stained using hematoxylin and eosin. Two different tissue sections were immunostained using conjugated  
537 antibodies as follows: 1) F4/80-FITC (1:100; BioLegend; 123107), CD11b-PE (1:100; BioLegend; 101207),  
538 CD206-BV421 (1:200; BioLegend; 141717) and CD86-Alexa Fluor 647 (1:100; BioLegend; 105019) using  
539 ordinary mounting medium; 2) alpha-SMA-eFluor660 (1:150; ThermoFisher Scientific; 50-9760-82), TGF-  
540 beta-PE (1:100; ThermoFisher Scientific; 12-9821-82) using DAPI mounting medium. Sections for TGF-  
541 beta were permeabilized using 0.1% Triton X in 1x PBS (PBST) for 8 mins then washed off with 1x PBS  
542 generously. Afterwards, blocking buffer (0.5 % bovine serum albumin in 1x PBS) was used to cover slides  
543 for 30 mins. Slides were then incubated in antibodies at 4 °C overnight. Subsequently, slides with tissue  
544 sections were washed in 1x PBS, and mounting medium applied.  
545

546 Immunostained sections on slides were imaged using a Leica DMI8 Thunder microscope fitted with a  
547 DFC9000 GTC sCMOS camera and LAS-X software (Leica, version 3.7.4). Imaging settings at 20x  
548 magnification and 100 % intensity were: 1) F4/80-FITC excitation using the 475 laser (filter 535/ 70; 500  
549 ms); CD11b-PE excitation using the 555 laser (no filter; 500 ms); CD206-BV421 excitation using 395 laser  
550 (no filter; 150 ms); CD86-Alexa Fluor 647 excitation using the 635 laser (no filter; 500 ms). 2) alpha-SMA-  
551 eFluor660 excitation using the 635 laser (no filter; 500 ms), TGF-beta-PE excitation using the 555 laser (no  
552 filter; 500 ms) and DAPI excitation using the 395 laser (535 filter; 500 ms). On the other hand, sections  
553 stained with hematoxylin and eosin were imaged at 40x using the Nikon Eclipse Ci microscope fitted with  
554 a CoolSNAP DYNO (Photometrics) and NIS elements BR 5.21.02 software (Nikon Instruments Inc.).  
555 Microscope images were prepared and analyzed using ImageJ (version 1.53k). For analyzing  
556 immunostained sections, 5 randomly selected rectangular areas of interest (1644.708  $\mu\text{m}^2$ ), encompassing  
557 cells adjacent to implants, were obtained as mean gray values<sup>71</sup> a tissue section. In the sham group,  
558 biopsies were taken from incision sites and areas without cells were also analyzed. Where derived from n  
559 = 2 or n = 3 mice, 10 or 15 data points, respectively are graphically represented to fully reveal inherent  
560 variance across samples (Fig. 7b-e; Fig. 8a-b); only the aPLA + HA group had sections derived from n = 2  
561 mice after one sample was damaged during cryo-sectioning and excluded from analyses. Representative  
562 images (16-bit; 0 to 65,535) were adjusted to enhance contrast for direct comparison using ImageJ as  
563 follows: CD86 (800 – 11,000), CD206 (2,000 – 5,000), F4/80 (500 – 4,000), CD11b (800 – 11,000), SMA  
564 (1,300 – 5,000), DAPI (6,000 – 31, 000), TGF (1,900 – 13,000).  
565

566 **Statistics and reproducibility.** Statistical software (GraphPad Prism) was used to analyse data presented  
567 as mean with standard deviation (SD). Significance level was set at  $p < 0.05$ , and details of statistical tests  
568 and sample sizes, which are biological replicates, are provided in figure legends. Exported data (mean, SD)  
569 from Wave in Seahorse experiments had the underlying assumption of normality and similar variance, and  
570 thus were tested using corresponding parametric tests as indicated in figure legends.  
571

572 **Data availability.** The data supporting the findings of this study are available within the paper and its  
573 Supplementary Information.  
574

## 575 References

- 576 1 Farah, S., Anderson, D. G. & Langer, R. Physical and mechanical properties of PLA, and  
577 their functions in widespread applications - A comprehensive review. *Adv Drug Deliv Rev*  
578 **107**, 367-392, doi:10.1016/j.addr.2016.06.012 (2016).  
579 2 Givissis, P. K., Stavridis, S. I., Papagelopoulos, P. J., Antonarakos, P. D. & Christodoulou, A.  
580 G. Delayed foreign-body reaction to absorbable implants in metacarpal fracture  
581 treatment. *Clinical Orthopaedics and Related Research*® **468**, 3377-3383 (2010).

- 582 3 Laine, P., Kontio, R., Lindqvist, C. & Suuronen, R. Are there any complications with  
583 bioabsorbable fixation devices?: a 10 year review in orthognathic surgery. *International*  
584 *journal of oral and maxillofacial surgery* **33**, 240-244 (2004).
- 585 4 Chalidis, B., Kitridis, D., Savvidis, P., Papalois, A. & Givissis, P. Does the Inion OTPStm  
586 absorbable plating system induce higher foreign-body reaction than titanium implants?  
587 An experimental randomized comparative study in rabbits. *Biomedical Materials* **15**,  
588 065011 (2020).
- 589 5 Poh, P. S. *et al.* Polylactides in additive biomanufacturing. *Advanced Drug Delivery*  
590 *Reviews* **107**, 228-246 (2016).
- 591 6 Ramot, Y., Haim-Zada, M., Domb, A. J. & Nyska, A. Biocompatibility and safety of PLA and  
592 its copolymers. *Adv Drug Deliv Rev* **107**, 153-162, doi:10.1016/j.addr.2016.03.012 (2016).
- 593 7 Mosier-LaClair, S., Pike, H. & Pomeroy, G. Intraosseous bioabsorbable poly-L-lactic acid  
594 screw presenting as a late foreign-body reaction: a case report. *Foot & ankle international*  
595 **22**, 247-251 (2001).
- 596 8 Athanasiou, K. A., Agrawal, C. M., Barber, F. A. & Burkhart, S. S. Orthopaedic applications  
597 for PLA-PGA biodegradable polymers. *Arthroscopy* **14**, 726-737, doi:10.1016/s0749-  
598 8063(98)70099-4 (1998).
- 599 9 Waris, E. *et al.* Long-term bone tissue reaction to polyethylene oxide/polybutylene  
600 terephthalate copolymer (Polyactive®) in metacarpophalangeal joint reconstruction.  
601 *Biomaterials* **29**, 2509-2515 (2008).
- 602 10 Agrawal, C. M. & Athanasiou, K. A. Technique to control pH in vicinity of biodegrading  
603 PLA-PGA implants. *J Biomed Mater Res* **38**, 105-114, doi:10.1002/(sici)1097-  
604 4636(199722)38:2<105::aid-jbm4>3.0.co;2-u (1997).
- 605 11 Taylor, M. S., Daniels, A. U., Andriano, K. P. & Heller, J. Six bioabsorbable polymers: in vitro  
606 acute toxicity of accumulated degradation products. *J Appl Biomater* **5**, 151-157,  
607 doi:10.1002/jab.770050208 (1994).
- 608 12 Deng, M. *et al.* Dipeptide-based Polyphosphazene and Polyester Blends for Bone Tissue  
609 Engineering. *Biomaterials* **31**, 4898-4908, doi:10.1016/j.biomaterials.2010.02.058 (2010).
- 610 13 Pajares-Chamorro, N. *et al.* Silver-doped bioactive glass particles for in vivo bone tissue  
611 regeneration and enhanced methicillin-resistant *Staphylococcus aureus* (MRSA)  
612 inhibition. *Materials Science and Engineering: C* **120**, 111693 (2021).
- 613 14 Lih, E. *et al.* A Bioinspired Scaffold with Anti-Inflammatory Magnesium Hydroxide and  
614 Decellularized Extracellular Matrix for Renal Tissue Regeneration. *ACS Cent Sci* **5**, 458-467,  
615 doi:10.1021/acscentsci.8b00812 (2019).
- 616 15 Xu, T. O., Kim, H. S., Stahl, T. & Nukavarapu, S. P. Self-neutralizing PLGA/magnesium  
617 composites as novel biomaterials for tissue engineering. *Biomed Mater* **13**, 035013,  
618 doi:10.1088/1748-605X/aaaa29 (2018).
- 619 16 Kamata, M., Sakamoto, Y. & Kishi, K. Foreign-body reaction to bioabsorbable plate and  
620 screw in craniofacial surgery. *Journal of Craniofacial Surgery* **30**, e34-e36 (2019).
- 621 17 Narayanan, G., Vernekar, V. N., Kuyinu, E. L. & Laurencin, C. T. Poly (lactic acid)-based  
622 biomaterials for orthopaedic regenerative engineering. *Advanced drug delivery reviews*  
623 **107**, 247-276 (2016).

- 624 18 Gonzalez-Lomas, G., Cassilly, R. T., Remotti, F. & Levine, W. N. Is the etiology of pretibial  
625 cyst formation after absorbable interference screw use related to a foreign body  
626 reaction? *Clinical Orthopaedics and Related Research*® **469**, 1082-1088 (2011).
- 627 19 Xie, N. *et al.* Glycolytic reprogramming in myofibroblast differentiation and lung fibrosis.  
628 *American journal of respiratory and critical care medicine* **192**, 1462-1474 (2015).
- 629 20 O'Neill, L. A. & Pearce, E. J. in *J Exp Med* Vol. 213 15-23 (2016).
- 630 21 Ignatius, A. A. & Claes, L. E. In vitro biocompatibility of bioresorbable polymers: poly(L,  
631 DL-lactide) and poly(L-lactide-co-glycolide). *Biomaterials* **17**, 831-839, doi:10.1016/0142-  
632 9612(96)81421-9 (1996).
- 633 22 Yang, Y. *et al.* In vitro degradation of porous poly (l-lactide-co-glycolide)/ $\beta$ -tricalcium  
634 phosphate (PLGA/ $\beta$ -TCP) scaffolds under dynamic and static conditions. *Polymer*  
635 *Degradation and Stability* **93**, 1838-1845 (2008).
- 636 23 Bostman, O. M. & Pihlajamaki, H. K. Adverse tissue reactions to bioabsorbable fixation  
637 devices. *Clin Orthop Relat Res*, 216-227 (2000).
- 638 24 Choueka, J. *et al.* Canine bone response to tyrosine-derived polycarbonates and poly(L-  
639 lactic acid). *J Biomed Mater Res* **31**, 35-41, doi:10.1002/(sici)1097-  
640 4636(199605)31:1<35::aid-jbm5>3.0.co;2-r (1996).
- 641 25 Athanasiou, K. A., Niederauer, G. G. & Agrawal, C. M. Sterilization, toxicity,  
642 biocompatibility and clinical applications of polylactic acid/polyglycolic acid copolymers.  
643 *Biomaterials* **17**, 93-102, doi:10.1016/0142-9612(96)85754-1 (1996).
- 644 26 Kanada, M. *et al.* Differential fates of biomolecules delivered to target cells via  
645 extracellular vesicles. *Proceedings of the National Academy of Sciences* **112**, E1433-E1442  
646 (2015).
- 647 27 Frottin, F. *et al.* The nucleolus functions as a phase-separated protein quality control  
648 compartment. *Science* **365**, 342-347 (2019).
- 649 28 Hui, S. *et al.* Glucose feeds the TCA cycle via circulating lactate. *Nature* **551**, 115-118  
650 (2017).
- 651 29 Feoktistova, M., Geserick, P. & Leverkus, M. Crystal violet assay for determining viability  
652 of cultured cells. *Cold Spring Harbor Protocols* **2016**, pdb. prot087379 (2016).
- 653 30 Gonçalves, R. & Mosser, D. M. The isolation and characterization of murine macrophages.  
654 *Current protocols in immunology* **111**, 14.11. 11-14.11. 16 (2015).
- 655 31 Infantino, V., Iacobazzi, V., Palmieri, F. & Menga, A. ATP-citrate lyase is essential for  
656 macrophage inflammatory response. *Biochemical and biophysical research*  
657 *communications* **440**, 105-111 (2013).
- 658 32 Jijon, H. B. *et al.* Inhibition of poly (ADP-ribose) polymerase attenuates inflammation in a  
659 model of chronic colitis. *American Journal of Physiology-Gastrointestinal and Liver*  
660 *Physiology* **279**, G641-G651 (2000).
- 661 33 Tan, Z. *et al.* in *The Journal of biological chemistry* Vol. 290 46-55 (2015).
- 662 34 Ip, W. E., Hoshi, N., Shouval, D. S., Snapper, S. & Medzhitov, R. Anti-inflammatory effect  
663 of IL-10 mediated by metabolic reprogramming of macrophages. *Science* **356**, 513-519  
664 (2017).
- 665 35 Mills, E. L. *et al.* Succinate Dehydrogenase Supports Metabolic Repurposing of  
666 Mitochondria to Drive Inflammatory Macrophages. *Cell* **167**, 457-470.e413,  
667 doi:10.1016/j.cell.2016.08.064 (2016).

- 668 36 Tannahill, G. *et al.* Succinate is a danger signal that induces IL-1 $\beta$  via HIF-1 $\alpha$ . *Nature* **496**,  
669 238-242, doi:10.1038/nature11986 (2013).
- 670 37 Clem, B. *et al.* Small-molecule inhibition of 6-phosphofructo-2-kinase activity suppresses  
671 glycolytic flux and tumor growth. *Molecular cancer therapeutics* **7**, 110-120 (2008).
- 672 38 Kauppinen, R. A., Sihra, T. S. & Nicholls, D. G. Aminooxyacetic acid inhibits the malate-  
673 aspartate shuttle in isolated nerve terminals and prevents the mitochondria from utilizing  
674 glycolytic substrates. *Biochim Biophys Acta* **930**, 173-178, doi:10.1016/0167-  
675 4889(87)90029-2 (1987).
- 676 39 Sprague, L. *et al.* Dendritic cells: in vitro culture in two-and three-dimensional collagen  
677 systems and expression of collagen receptors in tumors and atherosclerotic  
678 microenvironments. *Experimental cell research* **323**, 7-27 (2014).
- 679 40 Philpott, G. W. *et al.* RadioimmunoPET: detection of colorectal carcinoma with positron-  
680 emitting copper-64-labeled monoclonal antibody. *Journal of Nuclear Medicine* **36**, 1818-  
681 1824 (1995).
- 682 41 Wen, S.-S. *et al.* Metabolic reprogramming and its clinical application in thyroid cancer.  
683 *Oncology Letters* **18**, 1579-1584 (2019).
- 684 42 Pérez, E. Mechanical performance of in vitro degraded polylactic acid/hydroxyapatite  
685 composites. *Journal of Materials Science* **56**, 19915-19935 (2021).
- 686 43 Graney, P. L., Lurier, E. B. & Spiller, K. L. Biomaterials and bioactive factor delivery systems  
687 for the control of macrophage activation in regenerative medicine. *ACS Biomaterials*  
688 *Science & Engineering* **4**, 1137-1148 (2017).
- 689 44 Xue, H. *et al.* Enhanced tissue regeneration through immunomodulation of angiogenesis  
690 and osteogenesis with a multifaceted nanohybrid modified bioactive scaffold. *Bioactive*  
691 *Materials* (2022).
- 692 45 Veisoh, O. *et al.* Size- and shape-dependent foreign body immune response to materials  
693 implanted in rodents and non-human primates. *Nat Mater* **14**, 643-651,  
694 doi:10.1038/nmat4290 (2015).
- 695 46 Pariente, J.-L., Kim, B.-S. & Atala, A. In vitro biocompatibility evaluation of naturally  
696 derived and synthetic biomaterials using normal human bladder smooth muscle cells. *The*  
697 *Journal of urology* **167**, 1867-1871 (2002).
- 698 47 Andersson, S. R., Hakkarainen, M., Inkinen, S., Södergård, A. & Albertsson, A.-C.  
699 Polylactide stereocomplexation leads to higher hydrolytic stability but more acidic  
700 hydrolysis product pattern. *Biomacromolecules* **11**, 1067-1073 (2010).
- 701 48 Kozlov, A. M., Lone, A., Betts, D. H. & Cumming, R. C. Lactate preconditioning promotes a  
702 HIF-1 $\alpha$ -mediated metabolic shift from OXPHOS to glycolysis in normal human diploid  
703 fibroblasts. *Scientific reports* **10**, 1-16 (2020).
- 704 49 Olive, A. J., Kiritsy, M. & Sasseti, C. (Am Assoc Immunol, 2021).
- 705 50 Iliopoulos, D., Hirsch, H. A. & Struhl, K. An epigenetic switch involving NF- $\kappa$ B, Lin28, Let-7  
706 MicroRNA, and IL6 links inflammation to cell transformation. *Cell* **139**, 693-706 (2009).
- 707 51 Eming, S. A., Wynn, T. A. & Martin, P. Inflammation and metabolism in tissue repair and  
708 regeneration. *Science* **356**, 1026-1030 (2017).
- 709 52 Jiang, W. & Xu, J. Immune modulation by mesenchymal stem cells. *Cell proliferation* **53**,  
710 e12712 (2020).

- 711 53 Pajarinen, J. *et al.* Mesenchymal stem cell-macrophage crosstalk and bone healing.  
712 *Biomaterials* **196**, 80-89 (2019).
- 713 54 Swartzlander, M. D. *et al.* Immunomodulation by mesenchymal stem cells combats the  
714 foreign body response to cell-laden synthetic hydrogels. *Biomaterials* **41**, 79-88 (2015).
- 715 55 Van den Bossche, J. *et al.* Mitochondrial dysfunction prevents repolarization of  
716 inflammatory macrophages. *Cell reports* **17**, 684-696 (2016).
- 717 56 Manoharan, I., Prasad, P. D., Thangaraju, M. & Manicassamy, S. Lactate-Dependent  
718 Regulation of Immune Responses by Dendritic Cells and Macrophages. *Frontiers in*  
719 *Immunology*, 3062 (2021).
- 720 57 Zhang, A. *et al.* Lactate-induced M2 polarization of tumor-associated macrophages  
721 promotes the invasion of pituitary adenoma by secreting CCL17. *Theranostics* **11**, 3839  
722 (2021).
- 723 58 Lin, S. *et al.* Lactate-activated macrophages induced aerobic glycolysis and epithelial-  
724 mesenchymal transition in breast cancer by regulation of CCL5-CCR5 axis: a positive  
725 metabolic feedback loop. *Oncotarget* **8**, 110426 (2017).
- 726 59 Romero-Garcia, S., Moreno-Altamirano, M. M. B., Prado-Garcia, H. & Sánchez-García, F.  
727 J. Lactate contribution to the tumor microenvironment: mechanisms, effects on immune  
728 cells and therapeutic relevance. *Frontiers in immunology* **7**, 52 (2016).
- 729 60 Samuvel, D. J., Sundararaj, K. P., Nareika, A., Lopes-Virella, M. F. & Huang, Y. Lactate  
730 boosts TLR4 signaling and NF- $\kappa$ B pathway-mediated gene transcription in macrophages  
731 via monocarboxylate transporters and MD-2 up-regulation. *The Journal of Immunology*  
732 **182**, 2476-2484 (2009).
- 733 61 Yang, K. *et al.* Lactate Suppresses Macrophage Pro-Inflammatory Response to LPS  
734 Stimulation by Inhibition of YAP and NF- $\kappa$ B Activation via GPR81-Mediated Signaling.  
735 *Frontiers in Immunology* **11**, 2610 (2020).
- 736 62 Tang, C.-Y. & Mauro, C. Similarities in the metabolic reprogramming of immune system  
737 and endothelium. *Frontiers in immunology* **8**, 837 (2017).
- 738 63 Hsieh, T.-C. & Hsu, C.-W. Foreign body reaction mimicking local recurrence from  
739 polyactide adhesion barrier film after laparoscopic colorectal cancer surgery: A  
740 retrospective cohort study. *Medicine* **101** (2022).
- 741 64 Chong, G. O., Lee, Y. H., Hong, D. G., Cho, Y. L. & Lee, Y. S. Unabsorbed polylactide  
742 adhesion barrier mimicking recurrence of gynecologic malignant diseases with increased  
743 18F-FDG uptake on PET/CT. *Archives of Gynecology and Obstetrics* **292**, 191-195 (2015).
- 744 65 Bernardo, M. P. *et al.* PLA/Hydroxyapatite scaffolds exhibit in vitro immunological  
745 inertness and promote robust osteogenic differentiation of human mesenchymal stem  
746 cells without osteogenic stimuli. *Scientific reports* **12**, 1-15 (2022).
- 747 66 Kim, S.-S., Park, M. S., Jeon, O., Choi, C. Y. & Kim, B.-S. Poly (lactide-co-  
748 glycolide)/hydroxyapatite composite scaffolds for bone tissue engineering. *Biomaterials*  
749 **27**, 1399-1409 (2006).
- 750 67 Jha, A. K. *et al.* Network integration of parallel metabolic and transcriptional data reveals  
751 metabolic modules that regulate macrophage polarization. *Immunity* **42**, 419-430,  
752 doi:10.1016/j.immuni.2015.02.005 (2015).

- 753 68 Kanada, M. *et al.* Microvesicle-mediated delivery of minicircle DNA results in effective  
754 gene-directed enzyme prodrug cancer therapy. *Molecular cancer therapeutics* **18**, 2331-  
755 2342 (2019).
- 756 69 Negrin, R. S. & Contag, C. H. In vivo imaging using bioluminescence: a tool for probing  
757 graft-versus-host disease. *Nature Reviews Immunology* **6**, 484-490 (2006).
- 758 70 Poon, C. Measuring the density and viscosity of culture media for optimized  
759 computational fluid dynamics analysis of in vitro devices. *Journal of the Mechanical*  
760 *Behavior of Biomedical Materials* **126**, 105024 (2022).
- 761 71 Bravo-Hernandez, M. *et al.* Spinal subpial delivery of AAV9 enables widespread gene  
762 silencing and blocks motoneuron degeneration in ALS. *Nature medicine* **26**, 118-130  
763 (2020).

764  
765 **Acknowledgements.** Euthanized C57BL/6J mice were a gift from RR Neubig (facilitated by J Leipprandt)  
766 and the Campus Animal Resources at Michigan State University (MSU). Funding for this work was provided  
767 in part by the James and Kathleen Cornelius Endowment at MSU.

768  
769 **Author contributions.** Conceptualization, C.V.M. and C.H.C.; Methodology, C.V.M., K.R.Z., K.D.H.,  
770 S.B.G., R.N. and C.H.C.; Investigation, C.V.M., M.A., E.U., M.O.B., M.M.K., K.S., A.V.M., H.P., S.C., J.M.H.,  
771 C.L.M., S.J.C., M.H. and A.T.; Writing – Original Draft, C.V.M.; Writing – Review & Editing, C.V.M., M.A.,  
772 E.U., M.O.B., M.M.K., K.S., A.V.M., H.P., S.C., J.M.H., C.L.M., S.J.C., M.H., A.T., K.R.Z., K.D.H., S.B.G.,  
773 R.N. and C.H.C.; Funding Acquisition, C.H.C.; Resources, R.N. and C.H.C.; Supervision, K.R.Z., K.D.H.,  
774 S.B.G., R.N. and C.H.C.

775  
776 **Competing interests.** C.V.M and C.H.C are inventors on a pending patent application filed by Michigan  
777 State University on metabolic reprogramming to biodegradable polymers.

778  
779
